# Supplementary material for: PIE-1 SUMOylation promotes germline fates and piRNA-dependent silencing in C. elegans
Source: eLife. 2021 May 18;10:e63300. doi: 10.7554/eLife.63300 (PMC8131105; doi:10.7554/eLife.63300)
Supplement: Figure 2—source data 1. [file elife-63300-fig2-data1.xlsx]

## Sheet: Sheet1
Brood size at 20 degree
	wild-type	pie-1[K68R]	pie-1(zu154)/qc-1	pie-1[K68R]/pie-1(zu154)
#1	176	186	207	161
#2	183	160	89	77
#3	215	158	181	66
#4	236	148	76	145
#5	180	210	171	140
#6	207	230	172	69
#7	188	180	217	68
#8	169	72	205	69
#9	205	178	194	204
#10	179	85	201	163
#11	171	114	n/a	76
#12	181	229	n/a	126
#13	165	143	n/a	201
#14	222	214	n/a	119
#15	177	183	n/a	n/a
#16	187	162	n/a	n/a
#17	187	203	n/a	n/a
#18	222	187	n/a	n/a
#19	n/a	148	n/a	n/a
#20	n/a	72	n/a	n/a
Embryonic lethality(%)
	wild-type	pie-1[K68R]	pie-1(zu154)/qc-1	pie-1[K68R]/pie-1(zu154)
#1	3.529	0	2.899	0
#2	0	1.25	1.124	16.883
#3	0.93	30.38	2.21	22.727
#4	0.005	0	0	10.769
#5	1.667	1.905	0	2.702
#6	0	0	0.581	15.385
#7	0	2.222	1.382	3.636
#8	0	0	0.976	6.383
#9	0	0	0.515	26.984
#10	0	8.235	1.493	11.7188
#11	0.497	0.877	n/a	n/a
#12	0	0	n/a	n/a
#13	0	3.623	n/a	n/a
#14	0.497	0.469	n/a	n/a
#15	0	2.186	n/a	n/a
#16	0	0.617	n/a	n/a
#17	0	1.97	n/a	n/a
#18	0.004	2.139	n/a	n/a
#19	0	0.676	n/a	n/a
#20	0	1.408	n/a	n/a
