# Supplementary material for: PIE-1 SUMOylation promotes germline fates and piRNA-dependent silencing in C. elegans
Source: eLife. 2021 May 18;10:e63300. doi: 10.7554/eLife.63300 (PMC8131105; doi:10.7554/eLife.63300)
Supplement: Figure 3—source data 1. [file elife-63300-fig3-data1.xlsx]

## Sheet: full list sumo target
locus	wild-type	L4440	smo-1 RNAi	pie-1 RNAi	L4440-WT	L4440-smo-1 RNAi	L444-pie-1
B0250.1	15	1250	1149	918	1235	101	332
F13B10.2a	12	1159	926	857	1147	233	302
F43D9.4	9	230	202	119	221	28	111
Y37E3.8a	85	112	109	38	27	3	74
F32H2.5	20	189	164	122	169	25	67
F52D1.1		109	68	49	109	41	60
C08H9.2a	2	288	234	229	286	54	59
M88.5a	106	350	319	293	244	31	57
C44B7.10	4	201	156	155	197	45	46
F56F3.1	50	130	77	88	80	53	42
F49E12.2	3	86	15	47	83	71	39
F13D11.2a		90	64	59	90	26	31
C09H6.1a	3	158	84	128	155	74	30
K12C11.2	3	61	14	32	58	47	29
C25B8.3a	5	141	121	112	136	20	29
F49D11.1		58	23	30	58	35	28
Y37E3.17a		76	43	48	76	33	28
T05F1.6		60	37	32	60	23	28
Y71G12B.11a		87	31	60	87	56	27
E04A4.8		60	46	33	60	14	27
W08E3.2	3	35	16	9	32	19	26
C42D4.1	30	42	24	16	12	18	26
F37D6.2a		95	63	70	95	32	25
F49H12.1a		34	31	9	34	3	25
Y54G11A.6		63	62	38	63	1	25
T21C9.5a	5	36	18	12	31	18	24
F54C9.1		24	10		24	14	24
T05G5.10a	4	41	14	18	37	27	23
F54F3.1a	23	266	179	244	243	87	22
F10E7.7		39	11	17	39	28	22
Y45F10D.12	5	70	40	49	65	30	21
EEED8.8		41	28	20	41	13	21
Y53C12B.3a		27	15	6	27	12	21
C05D11.11a		51	27	31	51	24	20
Y54G11A.13a		63	62	43	63	1	20
Y48E1B.7	24	110	82	91	86	28	19
T05C3.5		38	18	19	38	20	19
F09E5.15a	2	27	10	9	25	17	18
D1054.15a		116	74	99	116	42	17
F44E7.4a		124	92	107	124	32	17
T07A9.6	6	89	58	72	83	31	17
Y48G8AL.8a		35	11	18	35	24	17
Y39E4A.3a		37	20	20	37	17	17
W09C5.8		20	10	3	20	10	17
R02D3.1a		17	10		17	7	17
M01E11.4b		23	19	6	23	4	17
Y71H2AM.23		41	19	25	41	22	16
W09H1.6a		55	35	39	55	20	16
W07G4.4		38	22	22	38	16	16
T22D1.9	25	192	121	177	167	71	15
Y5F2A.4	3	33	17	18	30	16	15
K04F10.7	38	40	24	25	2	16	15
F54F2.1		16	1	1	16	15	15
C46A5.9		20	8	5	20	12	15
R08C7.3		18	6	3	18	12	15
C36A4.4	1	45	36	30	44	9	15
F52D10.3a	15	57	50	42	42	7	15
T11B7.4b		23	18	8	23	5	15
K10B3.10a	4	408	369	394	404	39	14
Y67H2A.10a	3	60	32	46	57	28	14
K07A1.12		53	32	39	53	21	14
F37C12.9		16		2	16	16	14
BE0003N10.3		22	8	8	22	14	14
Y41D4A.5		24	11	10	24	13	14
M03D4.4a		31	19	17	31	12	14
F35F11.1		32	23	18	32	9	14
F42C5.8	7	44	36	30	37	8	14
C14F11.6		14	6		14	8	14
C34B2.7		37	16	24	37	21	13
R53.4	3	24	6	11	21	18	13
F36A2.1a		58	45	45	58	13	13
W09C5.1		35	25	22	35	10	13
D1046.2		19	10	6	19	9	13
R07G3.7a		17	13	4	17	4	13
F59E12.5a		52	49	39	52	3	13
K08F9.2		47	28	35	47	19	12
F40F9.6a		46	29	34	46	17	12
F10D11.1	2	36	19	24	34	17	12
F58G11.2a	10	232	216	220	222	16	12
R10D12.14a	17	38	23	26	21	15	12
C37C3.8a		38	24	26	38	14	12
ZK994.3		19	6	7	19	13	12
F11A10.8		25	13	13	25	12	12
F28C6.3		13	1	1	13	12	12
F54E7.2	1	12			11	12	12
W04D2.4	32	93	82	81	61	11	12
F18A1.2a		13	4	1	13	9	12
Y48G1C.2		21	13	9	21	8	12
F39H11.2a		50	45	38	50	5	12
R06C7.1		19	14	7	19	5	12
M142.2	2	12	7		10	5	12
K04D7.1	6	59	29	48	53	30	11
C03G5.1		34	18	23	34	16	11
C15F1.7a		24	11	13	24	13	11
Y40B1A.4		15	4	4	15	11	11
R07E5.2		13	2	2	13	11	11
K02B2.5	1	11	2		10	9	11
Y57A10C.6		19	12	8	19	7	11
C32E8.2a	3	26	21	15	23	5	11
F28D1.1		34	30	23	34	4	11
Y17G7B.3		33	32	22	33	1	11
ZK353.9	3	34	33	23	31	1	11
C36B1.5		35	16	25	35	19	10
Y37D8A.2	9	99	83	89	90	16	10
C17H12.1		24	9	14	24	15	10
C01F6.6a	27	108	96	98	81	12	10
K11H12.2		48	36	38	48	12	10
F14D12.2	19	66	56	56	47	10	10
T05E11.1	2	21	11	11	19	10	10
C06C3.1a		15	5	5	15	10	10
F52G2.2a		22	13	12	22	9	10
Y54H5A.1		14	5	4	14	9	10
F27D4.5		17	13	7	17	4	10
F59E12.4a		51	48	41	51	3	10
F26D10.3	29	100	64	91	71	36	9
Y57A10A.18a	59	288	253	279	229	35	9
F25H2.11	1	19	1	10	18	18	9
Y54F10AM.4a		18		9	18	18	9
Y48B6A.11		25	8	16	25	17	9
F57B10.3a		54	42	45	54	12	9
C15H11.3a		49	37	40	49	12	9
T27C4.4a		35	23	26	35	12	9
C44B12.1		9			9	9	9
B0336.2	7	25	17	16	18	8	9
E01A2.2a		12	4	3	12	8	9
T18D3.1	1	78	71	69	77	7	9
F26D10.10		36	29	27	36	7	9
C50D2.8	5	35	29	26	30	6	9
Y55F3AM.15		26	20	17	26	6	9
F44G4.2		10	4	1	10	6	9
Y73B6BL.5a	10	17	12	8	7	5	9
K07C5.4		22	18	13	22	4	9
F56E10.4	3	16	12	7	13	4	9
M05D6.6		11	7	2	11	4	9
F59B8.2a	1	22	19	13	21	3	9
C01F1.3a		16	15	7	16	1	9
F25B5.4a		122	48	114	122	74	8
T04C12.5		169	135	161	169	34	8
T27E9.7	6	112	85	104	106	27	8
C25H3.9a		23	9	15	23	14	8
F41C3.5		16	3	8	16	13	8
F46E10.10a	1	37	25	29	36	12	8
Y37E11AL.7a		16	4	8	16	12	8
R05F9.6		24	13	16	24	11	8
F53F10.3		10	1	2	10	9	8
W02D9.1a		12	4	4	12	8	8
C05D11.12		11	4	3	11	7	8
E02H1.2		10	3	2	10	7	8
F56B3.11a		8	1		8	7	8
F09B9.2a		16	10	8	16	6	8
ZK1151.1a		10	4	2	10	6	8
F52B11.3	1	8	2		7	6	8
F52E1.1	5	19	14	11	14	5	8
ZK973.3		54	51	46	54	3	8
M03F4.2a	45	164	123	157	119	41	7
F32D1.5		47	32	40	47	15	7
T03E6.7a		34	19	27	34	15	7
R06F6.12	1	30	16	23	29	14	7
F25H2.5	1	14		7	13	14	7
T12E12.1		22	9	15	22	13	7
R151.7a		25	13	18	25	12	7
B0035.9		15	3	8	15	12	7
H13N06.6a	1	36	25	29	35	11	7
T13B5.3		23	14	16	23	9	7
B0041.2a	1	22	13	15	21	9	7
C53A5.3		74	66	67	74	8	7
C39F7.4	2	23	15	16	21	8	7
M7.1		10	2	3	10	8	7
F28C6.7a		8	2	1	8	6	7
B0303.3		22	18	15	22	4	7
K07A1.11		38	35	31	38	3	7
K12H4.3		10	7	3	10	3	7
M106.4a		22	20	15	22	2	7
F28H1.3	16	94	61	88	78	33	6
F59A2.1a	2	29	9	23	27	20	6
T02G5.9a	8	74	58	68	66	16	6
F10B5.1		29	15	23	29	14	6
C27H6.8		13	1	7	13	12	6
F56F3.5	7	25	14	19	18	11	6
F57H12.1	7	25	14	19	18	11	6
R13A5.8		13	2	7	13	11	6
F11C3.3	3	14	3	8	11	11	6
T04G9.5		12	2	6	12	10	6
ZK688.9	5	12	2	6	7	10	6
Y57G11C.16	2	22	13	16	20	9	6
F32B6.2		15	7	9	15	8	6
F28B3.7a		13	5	7	13	8	6
F53C11.8		7		1	7	7	6
R04F11.2		7		1	7	7	6
T24C4.7		7		1	7	7	6
R13H8.1a	5	7		1	2	7	6
Y56A3A.21	3	32	26	26	29	6	6
F46E10.9	4	16	10	10	12	6	6
B0025.2		8	2	2	8	6	6
F25D7.3a		6			6	6	6
F26B1.3	10	42	37	36	32	5	6
Y71F9AM.6	6	22	17	16	16	5	6
F42G8.10a	1	14	9	8	13	5	6
F38E11.3		8	3	2	8	5	6
Y113G7A.3	2	27	23	21	25	4	6
Y18D10A.17		19	15	13	19	4	6
C25E10.12		8	4	2	8	4	6
C34F6.8		6	2		6	4	6
K07A12.3	1	16	13	10	15	3	6
T10B5.5a	10	33	31	27	23	2	6
R11H6.1		14	12	8	14	2	6
C17D12.2		8	6	2	8	2	6
Y105E8A.26a		7	5	1	7	2	6
F13E6.4		6	4		6	2	6
R148.5a		6	4		6	2	6
T04C12.4		159		154	159	159	5
C01G8.5a	2	113	82	108	111	31	5
R12C12.1a		20	7	15	20	13	5
W07A8.3a		11		6	11	11	5
Y47D3A.16		17	7	12	17	10	5
B0547.1		11	3	6	11	8	5
C47B2.4	1	12	4	7	11	8	5
ZC376.5		10	2	5	10	8	5
Y39A1A.6		8		3	8	8	5
W01A8.4		15	8	10	15	7	5
Y49E10.19		11	4	6	11	7	5
C53B7.4		12	6	7	12	6	5
K12H4.4	2	9	4	4	7	5	5
T04F8.1		7	2	2	7	5	5
Y71G12B.20a		6	1	1	6	5	5
B0334.15		5			5	5	5
C34G6.6a		5			5	5	5
K08F4.2	5	34	30	29	29	4	5
C07D8.6	1	26	22	21	25	4	5
C48G7.3a		7	3	2	7	4	5
T05H10.6a	2	9	5	4	7	4	5
F44B9.6		12	9	7	12	3	5
C08B11.2		9	6	4	9	3	5
C06E7.3a		5	2		5	3	5
R11A8.5		5	2		5	3	5
ZK1073.1		11	9	6	11	2	5
R07G3.1		7	5	2	7	2	5
F11A10.1a		34	33	29	34	1	5
Y39A3CL.6		11	10	6	11	1	5
ZK370.8		10	9	5	10	1	5
F32H2.9		5	4		5	1	5
C03D6.3a	2	65	42	61	63	23	4
F46B6.7		27	9	23	27	18	4
R12E2.3		51	35	47	51	16	4
C47D12.6a	1	70	56	66	69	14	4
F35G12.10	12	54	41	50	42	13	4
K08A8.1a	11	32	19	28	21	13	4
ZK270.2a		13	2	9	13	11	4
ZC518.3a	1	47	37	43	46	10	4
F58B3.5a	9	78	69	74	69	9	4
B0511.8		44	35	40	44	9	4
T05G5.7a	2	20	13	16	18	7	4
C37H5.6a		10	3	6	10	7	4
Y71G12B.24		10	4	6	10	6	4
R07E5.13		6		2	6	6	4
ZK858.3		6		2	6	6	4
F01F1.9		12	7	8	12	5	4
F33H2.6		7	2	3	7	5	4
F45E12.1a		6	2	2	6	4	4
F02E9.10a		5	1	1	5	4	4
F10G8.3		4			4	4	4
F54C9.10		4			4	4	4
K10C3.6a		4			4	4	4
M04F3.4a		4			4	4	4
R06C7.3		4			4	4	4
T26A5.9		4			4	4	4
W06H3.2a		4			4	4	4
Y66D12A.15		4			4	4	4
ZK858.7		4			4	4	4
T20D3.7a		11	8	7	11	3	4
F53F10.4	3	11	8	7	8	3	4
F39B2.10		6	3	2	6	3	4
Y57A10A.26		6	3	2	6	3	4
B0336.10		5	2	1	5	3	4
C02F5.6a		5	2	1	5	3	4
Y48B6A.1		4	1		4	3	4
C16A3.10a		19	17	15	19	2	4
Y77E11A.7a		18	16	14	18	2	4
W03C9.3		5	3	1	5	2	4
C18F3.2a		4	2		4	2	4
F40F11.1		4	2		4	2	4
B0361.3		22	21	18	22	1	4
F28D1.7		8	7	4	8	1	4
F36A2.7		7	6	3	7	1	4
R12H7.2	11	148	117	145	137	31	3
K07C11.2	1	28	15	25	27	13	3
C07A12.5a		22	9	19	22	13	3
Y71F9AL.18		14	5	11	14	9	3
W02D7.7		10	1	7	10	9	3
F25D1.1a		12	4	9	12	8	3
K10D2.6	2	13	5	10	11	8	3
D1007.6		8		5	8	8	3
C06E7.4	8	13	5	10	5	8	3
T24H7.5b		9	2	6	9	7	3
Y23H5A.3		9	2	6	9	7	3
Y53C12A.4		14	8	11	14	6	3
F53H1.4a		11	6	8	11	5	3
R11E3.8a		9	4	6	9	5	3
F52B5.6	1	8	3	5	7	5	3
Y47D3A.26a		5		2	5	5	3
T09E8.1a	4	5		2	1	5	3
T25B9.9	12	40	36	37	28	4	3
Y108G3AL.2		11	7	8	11	4	3
R12B2.4		6	2	3	6	4	3
C44C8.6		5	1	2	5	4	3
E04A4.5		4		1	4	4	3
C18E9.4		7	4	4	7	3	3
R09B3.5		5	2	2	5	3	3
BE0003N10.1		3			3	3	3
C06A6.5		3			3	3	3
F10D11.2		3			3	3	3
F53H10.2a		3			3	3	3
F54D5.12		3			3	3	3
K02D10.1a		3			3	3	3
K04D7.3a		3			3	3	3
M01E10.2a		3			3	3	3
R07H5.2a		3			3	3	3
R11A8.4a		3			3	3	3
R11D1.9		3			3	3	3
T01C3.6		3			3	3	3
T23G7.1		3			3	3	3
Y59A8B.6		3			3	3	3
Y73B3A.18a		3			3	3	3
D1069.3a		7	5	4	7	2	3
Y43F8C.7		5	3	2	5	2	3
F08G12.2		3	1		3	2	3
T19B4.1		3	1		3	2	3
C15C7.4	1	3	1		2	2	3
M01E11.7a		25	24	22	25	1	3
C34F11.3a		11	10	8	11	1	3
K11E8.1d		7	6	4	7	1	3
C02F5.9		3	2		3	1	3
C06G4.1		3	2		3	1	3
M01D7.6		3	2		3	1	3
T05F1.3		3	2		3	1	3
M02D8.4a		65	29	63	65	36	2
M106.1		79	58	77	79	21	2
T22B11.5a	1	139	123	137	138	16	2
W02B12.10		52	38	50	52	14	2
T20G5.2	28	74	61	72	46	13	2
Y108G3AL.1		26	18	24	26	8	2
Y71H2AM.11	3	18	11	16	15	7	2
F22B5.9		10	3	8	10	7	2
T12D8.9a		9	2	7	9	7	2
Y50D4C.4		10	4	8	10	6	2
Y56A3A.12a	3	11	5	9	8	6	2
T05A10.1a		6		4	6	6	2
W03F8.5		13	8	11	13	5	2
B0035.8		9	4	7	9	5	2
F36H1.6		6	1	4	6	5	2
F22D3.1a		5		3	5	5	2
F29B9.6		5		3	5	5	2
Y38E10A.22a	2	6	1	4	4	5	2
C28D4.3	2	41	37	39	39	4	2
C53A5.1	6	33	29	31	27	4	2
K01G5.4	2	15	11	13	13	4	2
ZK1098.4		13	9	11	13	4	2
R151.3	3	10	6	8	7	4	2
T23G5.2a		4		2	4	4	2
Y66H1A.2a		10	7	8	10	3	2
Y61A9LA.10		7	4	5	7	3	2
ZK616.6		6	3	4	6	3	2
C06E7.1a		5	2	3	5	3	2
F35G12.11		5	2	3	5	3	2
T07D3.9a		5	2	3	5	3	2
C04G2.6		3		1	3	3	2
C38C3.5a		3		1	3	3	2
F09G2.4		3		1	3	3	2
F39B2.6		3		1	3	3	2
Y51H1A.3a		3		1	3	3	2
Y60A3A.9	1	11	9	9	10	2	2
R10E4.2b		8	6	6	8	2	2
Y37E3.7		6	4	4	6	2	2
F57C7.1a		5	3	3	5	2	2
F52F12.3		3	1	1	3	2	2
F59E10.1		3	1	1	3	2	2
B0035.14a		2			2	2	2
B0035.16		2			2	2	2
B0412.4		2			2	2	2
C09B8.7a		2			2	2	2
C14B9.6a		2			2	2	2
C17G10.8		2			2	2	2
C26E6.2		2			2	2	2
C26F1.7a		2			2	2	2
C27A2.2a		2			2	2	2
C34B2.10		2			2	2	2
C35D10.6		2			2	2	2
C37A2.7		2			2	2	2
C41H7.3		2			2	2	2
C53B4.7a		2			2	2	2
D1081.7a		2			2	2	2
F01G10.7		2			2	2	2
F20G2.3a		2			2	2	2
F23H12.4a		2			2	2	2
F25F2.2a		2			2	2	2
F32D8.5a		2			2	2	2
F35G2.4		2			2	2	2
F41G4.2a		2			2	2	2
F44F1.7		2			2	2	2
F53A2.6a		2			2	2	2
F54D8.2		2			2	2	2
F54F2.9		2			2	2	2
H24K24.3a		2			2	2	2
JC8.6a		2			2	2	2
K04G2.5		2			2	2	2
K07C11.7a		2			2	2	2
K12H6.1		2			2	2	2
M01F1.2		2			2	2	2
M106.5		2			2	2	2
R74.5a		2			2	2	2
T22D1.10		2			2	2	2
Y105C5B.21a		2			2	2	2
Y105E8A.16		2			2	2	2
Y105E8A.2		2			2	2	2
Y18D10A.20		2			2	2	2
Y38A8.2		2			2	2	2
Y38F2AR.9	2	4	2	2	2	2	2
Y44E3A.6a		2			2	2	2
Y48G1A.3		2			2	2	2
Y53F4B.9		2			2	2	2
Y57G11C.13		2			2	2	2
ZC404.8		2			2	2	2
Y40B1B.6		5	4	3	5	1	2
Y37E11AL.8		4	3	2	4	1	2
Y37A1B.2b		3	2	1	3	1	2
Y48G1C.7		3	2	1	3	1	2
Y55H10A.1	3	6	5	4	3	1	2
F46A9.6		2	1		2	1	2
F46B6.5a		2	1		2	1	2
T19C3.8		2	1		2	1	2
Y106G6E.6		2	1		2	1	2
T28H10.3		26	6	25	26	20	1
F45F2.10		46	31	45	46	15	1
F49E8.5	2	36	21	35	34	15	1
F18A1.5		34	22	33	34	12	1
C01G10.8	2	32	21	31	30	11	1
T23G7.5a		20	10	19	20	10	1
T09B4.9		24	15	23	24	9	1
Y54E10A.3	2	22	13	21	20	9	1
F54H12.1a	9	24	15	23	15	9	1
F54A3.3	4	8		7	4	8	1
K07G5.6		19	12	18	19	7	1
K07D4.3	3	9	2	8	6	7	1
Y65B4BL.5	6	28	22	27	22	6	1
C03C10.1		19	13	18	19	6	1
B0495.5		9	3	8	9	6	1
F02A9.4a		8	2	7	8	6	1
T20H4.3a		7	1	6	7	6	1
T05H4.5	3	6		5	3	6	1
T06E6.2a		14	9	13	14	5	1
W01A11.5		5		4	5	5	1
F09E5.1		18	14	17	18	4	1
F38A5.2a	4	17	13	16	13	4	1
M03C11.5		13	9	12	13	4	1
Y57G11C.11a		13	9	12	13	4	1
F36A2.6		6	2	5	6	4	1
Y37A1B.5a		6	2	5	6	4	1
C39E9.13	8	12	8	11	4	4	1
F08B6.3		4		3	4	4	1
F58G6.5a		4		3	4	4	1
Y75B8A.30		12	9	11	12	3	1
R05H10.3a		10	7	9	10	3	1
VF13D12L.1		9	6	8	9	3	1
Y54E2A.11a		6	3	5	6	3	1
F31E3.3		5	2	4	5	3	1
T23B5.1a		4	1	3	4	3	1
C14B9.7		3		2	3	3	1
F13D12.4a		3		2	3	3	1
F39H11.5		3		2	3	3	1
K08F11.5		3		2	3	3	1
T01B11.2a		3		2	3	3	1
T16G1.11		5	3	4	5	2	1
ZK177.4	1	5	3	4	4	2	1
C09D4.5	4	7	5	6	3	2	1
F49D11.9		3	1	2	3	2	1
F54B3.3		3	1	2	3	2	1
B0285.7		2		1	2	2	1
C27H6.2		2		1	2	2	1
F29B9.2a		2		1	2	2	1
F57B10.14		2		1	2	2	1
K12F2.1		2		1	2	2	1
Y111B2A.17		2		1	2	2	1
Y79H2A.6		2		1	2	2	1
ZK353.8		2		1	2	2	1
C35C5.3a	6	30	29	29	24	1	1
Y113G7A.9a		23	22	22	23	1	1
T02G5.8		9	8	8	9	1	1
Y49A3A.2		6	5	5	6	1	1
W09C5.2		5	4	4	5	1	1
F07D10.1	1	5	4	4	4	1	1
ZK863.3		4	3	3	4	1	1
C50E3.5		2	1	1	2	1	1
F09E5.2		2	1	1	2	1	1
F20D1.6		2	1	1	2	1	1
F38A5.1a		2	1	1	2	1	1
H27M09.1		2	1	1	2	1	1
W04G3.5a		2	1	1	2	1	1
Y119D3B.11		2	1	1	2	1	1
B0303.9		1			1	1	1
B0495.9		1			1	1	1
C01G10.11a		1			1	1	1
C01G5.6		1			1	1	1
C01H6.7a		1			1	1	1
C03D6.4		1			1	1	1
C06B8.1		1			1	1	1
C06G3.10		1			1	1	1
C07D10.5		1			1	1	1
C09G12.8a		1			1	1	1
C09G5.2a		1			1	1	1
C14A4.5		1			1	1	1
C32E8.11		1			1	1	1
C50F4.16		1			1	1	1
D2085.3		1			1	1	1
F01F1.6		1			1	1	1
F09E5.3		1			1	1	1
F15C11.1		1			1	1	1
F18C12.2a		1			1	1	1
F18E3.7a		1			1	1	1
F20B6.8a		1			1	1	1
F20C5.5		1			1	1	1
F20D6.4a		1			1	1	1
F21C3.3		1			1	1	1
F32A7.5a		1			1	1	1
F38H4.6		1			1	1	1
F40G9.3		1			1	1	1
F41E6.13a		1			1	1	1
F41E6.6		1			1	1	1
F42A10.4a		1			1	1	1
F44C4.4a		1			1	1	1
F55A4.1		1			1	1	1
F55A4.5		1			1	1	1
K02F6.7		1			1	1	1
K05C4.1		1			1	1	1
K09H11.15		1			1	1	1
K12H4.5		1			1	1	1
M57.2a		1			1	1	1
M6.1a		1			1	1	1
M70.5		1			1	1	1
R07B1.1		1			1	1	1
R17.2		1			1	1	1
T04B2.2a		1			1	1	1
T10B10.3		1			1	1	1
T14B4.3		1			1	1	1
T15H9.4		1			1	1	1
T20D4.11		1			1	1	1
T21H8.5		1			1	1	1
T25G12.4		1			1	1	1
W03F9.1		1			1	1	1
W09G10.4a		1			1	1	1
Y18D10A.19		1			1	1	1
Y26E6A.1		1			1	1	1
Y38C1BA.2a		1			1	1	1
Y39B6A.20		1			1	1	1
Y45F3A.3a		1			1	1	1
Y47D3B.10		1			1	1	1
Y48B6A.12		1			1	1	1
Y48E1B.10		1			1	1	1
Y48G8AL.10		1			1	1	1
Y51H1A.5		1			1	1	1
Y54E10BR.6		1			1	1	1
Y54E2A.2		1			1	1	1
Y54F10AM.2a		1			1	1	1
Y59E9AL.7		1			1	1	1
Y66D12A.23		1			1	1	1
Y69A2AL.1		1			1	1	1
Y71G12B.8		1			1	1	1
Y92C3B.2a		1			1	1	1
ZC250.1a		1			1	1	1
ZC373.1a		1			1	1	1
ZC395.2		1			1	1	1
ZK1248.10		1			1	1	1
ZK1320.9		1			1	1	1
ZK287.1a		1			1	1	1
ZK328.1a		1			1	1	1
ZK632.4		1			1	1	1
T23G5.1	3	125	101	125	122	24	0
R04E5.10a		40	24	40	40	16	0
F32D1.10	5	31	18	31	26	13	0
K09C8.5		16	7	16	16	9	0
Y24D9A.8a	1	9	1	9	8	8	0
Y71F9B.3		10	3	10	10	7	0
Y116A8A.9a		8	1	8	8	7	0
D2013.9		15	9	15	15	6	0
F59G1.3	10	12	6	12	2	6	0
W02A11.4	2	26	21	26	24	5	0
Y53G8AR.2a		14	9	14	14	5	0
Y43F4B.5a		7	2	7	7	5	0
C29A12.3a		6	1	6	6	5	0
D2013.2		5		5	5	5	0
T04C9.1a		5		5	5	5	0
T25C8.2		47	43	47	47	4	0
ZK20.5	6	30	26	30	24	4	0
R12B2.5a		9	5	9	9	4	0
C24F3.4a		8	4	8	8	4	0
C07F11.1		5	1	5	5	4	0
W07A8.2a		5	1	5	5	4	0
C03D6.5		4		4	4	4	0
D2030.6		4		4	4	4	0
T04G9.3		21	18	21	21	3	0
C08B6.9	1	16	13	16	15	3	0
F44G4.8a		10	7	10	10	3	0
C13B9.3		8	5	8	8	3	0
C34E10.5		5	2	5	5	3	0
JC8.3a		5	2	5	5	3	0
C04F12.4		3		3	3	3	0
C09H6.3		3		3	3	3	0
C45G3.5		3		3	3	3	0
F20B6.2		3		3	3	3	0
F33D11.10		3		3	3	3	0
K03H1.2		3		3	3	3	0
ZK1307.6	19	77	75	77	58	2	0
K11H3.3		7	5	7	7	2	0
T26E3.3a		5	3	5	5	2	0
F35G2.1a		4	2	4	4	2	0
R02D3.5		3	1	3	3	2	0
T23H2.5		3	1	3	3	2	0
Y48G8AL.5		3	1	3	3	2	0
ZK632.1a		3	1	3	3	2	0
D1054.2		2		2	2	2	0
D2013.7		2		2	2	2	0
F47C12.2		2		2	2	2	0
K01G5.5		2		2	2	2	0
M03C11.4		2		2	2	2	0
R05D11.8		2		2	2	2	0
R09A8.3		2		2	2	2	0
T06E4.1		2		2	2	2	0
Y106G6H.3a		2		2	2	2	0
Y106G6H.5		2		2	2	2	0
Y41E3.1a		2		2	2	2	0
Y49E10.3a		2		2	2	2	0
C07G1.5		107	106	107	107	1	0
ZK1058.1	2	19	18	19	17	1	0
F56A3.4		6	5	6	6	1	0
ZC477.9a		6	5	6	6	1	0
F53A10.2a		5	4	5	5	1	0
E02H4.3a		4	3	4	4	1	0
T10A3.1a		4	3	4	4	1	0
Y56A3A.20		3	2	3	3	1	0
ZK370.5		3	2	3	3	1	0
R11H6.5		2	1	2	2	1	0
ZK524.4		2	1	2	2	1	0
B0218.3		1		1	1	1	0
C05G5.4		1		1	1	1	0
E01F3.1b		1		1	1	1	0
F38A5.7		1		1	1	1	0
F58A4.4a		1		1	1	1	0
F58E10.3a		1		1	1	1	0
K03A1.5		1		1	1	1	0
T13H2.4a		1		1	1	1	0
W07E6.1		1		1	1	1	0
Y38E10A.6a		1		1	1	1	0
Y53F4B.20		1		1	1	1	0
Y55F3AM.4a		1		1	1	1	0
Y76A2B.3		1		1	1	1	0
Y87G2A.6		1		1	1	1	0
ZC395.3a		1		1	1	1	0
ZC434.2		1		1	1	1	0
W08E12.7		26	6	27	26	20	-1
ZK829.4	6	75	56	76	69	19	-1
F02E9.9a	17	59	41	60	42	18	-1
F38H4.9	6	49	40	50	43	9	-1
T27A3.2		8	2	9	8	6	-1
F28H6.4		6		7	6	6	-1
Y54G2A.17a	3	9	3	10	6	6	-1
ZK550.3		8	3	9	8	5	-1
C27A12.2		4		5	4	4	-1
F13D12.7a		4		5	4	4	-1
ZC308.1a		15	12	16	15	3	-1
Y53F4B.39a		6	3	7	6	3	-1
F42A10.1		5	2	6	5	3	-1
F47G9.1		3		4	3	3	-1
W05G11.6a		3		4	3	3	-1
Y57A10A.27		3		4	3	3	-1
F26H9.6	2	3		4	1	3	-1
F47B10.1	2	17	15	18	15	2	-1
Y54F10BM.1		10	8	11	10	2	-1
R05D3.11		5	3	6	5	2	-1
C41G7.9a	1	5	3	6	4	2	-1
Y54F10AR.1		4	2	5	4	2	-1
F23B12.6	6	9	7	10	3	2	-1
B0280.1a		2		3	2	2	-1
C26D10.2a	2	4	2	5	2	2	-1
C44B7.5		2		3	2	2	-1
T25G3.3		2		3	2	2	-1
ZK131.11a		2		3	2	2	-1
R07G3.5	1	60	59	61	59	1	-1
F53C11.7		9	8	10	9	1	-1
F32A11.1		8	7	9	8	1	-1
Y82E9BR.14a		7	6	8	7	1	-1
H38K22.2a	3	7	6	8	4	1	-1
F53F1.2		2	1	3	2	1	-1
Y54E10A.6		2	1	3	2	1	-1
C05D11.2		1		2	1	1	-1
F36D3.2		1		2	1	1	-1
F42A6.7a		1		2	1	1	-1
F59E10.3		1		2	1	1	-1
H02I12.8		1		2	1	1	-1
T14G10.2a		1		2	1	1	-1
Y54F10BM.2		1		2	1	1	-1
ZK1236.3a		1		2	1	1	-1
ZK686.3		1		2	1	1	-1
ZK688.5a		1		2	1	1	-1
Y59A8A.3	23	57	27	59	34	30	-2
Y39G10AR.14		19	3	21	19	16	-2
C49H3.5a		66	51	68	66	15	-2
Y106G6H.2a	3	23	8	25	20	15	-2
F02E8.1	1	23	13	25	22	10	-2
C49H3.11	5	18	8	20	13	10	-2
C30F8.2		10		12	10	10	-2
Y66H1B.4		10	2	12	10	8	-2
B0228.7		9	1	11	9	8	-2
DY3.2		8	1	10	8	7	-2
C46F11.2a		7		9	7	7	-2
C09H10.3		8	2	10	8	6	-2
T10F2.4		7	2	9	7	5	-2
Y92H12BR.3a	5	9	4	11	4	5	-2
Y55B1AR.1		13	9	15	13	4	-2
F10C1.7a		9	5	11	9	4	-2
Y48B6A.3		6	2	8	6	4	-2
F57B9.10a		20	17	22	20	3	-2
C25A1.8		3		5	3	3	-2
Y6D11A.2		10	8	12	10	2	-2
F56D2.6a		7	5	9	7	2	-2
Y75B12B.2	1	6	4	8	5	2	-2
F21A3.11		4	2	6	4	2	-2
H15N14.1c		4	2	6	4	2	-2
F11E6.1a		2		4	2	2	-2
T08B2.9a		2		4	2	2	-2
Y22F5A.4		2		4	2	2	-2
ZK637.5	1	6	5	8	5	1	-2
F14E5.2a	4	8	7	10	4	1	-2
R06C7.5a		4	3	6	4	1	-2
F59A6.5		2	1	4	2	1	-2
T05F1.2		2	1	4	2	1	-2
B0403.4	2	3	2	5	1	1	-2
C26E6.8		1		3	1	1	-2
C36A4.5		1		3	1	1	-2
F25B4.6		1		3	1	1	-2
F37B4.2		1		3	1	1	-2
F49D11.10		1		3	1	1	-2
JC8.10a		1		3	1	1	-2
T10F2.3		1		3	1	1	-2
W09B6.1a		1		3	1	1	-2
Y46H3A.6		1		3	1	1	-2
Y63D3A.5		1		3	1	1	-2
ZK652.10		1		3	1	1	-2
Y41E3.4a	5	64	38	67	59	26	-3
K01C8.10	1	36	17	39	35	19	-3
F25H5.3a	2	36	17	39	34	19	-3
ZC434.5		22	8	25	22	14	-3
F52E4.1a	5	17	6	20	12	11	-3
Y113G7B.17	7	43	35	46	36	8	-3
W03D2.4		10	3	13	10	7	-3
F53A2.7	1	9	2	12	8	7	-3
T03F6.3		9	3	12	9	6	-3
F57C2.5a	2	14	9	17	12	5	-3
C07A12.4a		9	4	12	9	5	-3
T26A5.5a		9	4	12	9	5	-3
F43E2.8	8	13	8	16	5	5	-3
B0041.4	5	64	60	67	59	4	-3
B0280.9		15	11	18	15	4	-3
T09B9.4		7	3	10	7	4	-3
B0491.5	6	21	18	24	15	3	-3
M7.5		9	6	12	9	3	-3
C14F11.1a	4	10	7	13	6	3	-3
Y43F4B.4		6	3	9	6	3	-3
F56H1.4		3		6	3	3	-3
LLC1.3a	2	11	9	14	9	2	-3
C32F10.8a		2		5	2	2	-3
E04D5.1a		2		5	2	2	-3
F40F12.5a		2		5	2	2	-3
W10D5.3c	19	113	112	116	94	1	-3
C39E9.14a		9	8	12	9	1	-3
T14G8.1		9	8	12	9	1	-3
M18.5		8	7	11	8	1	-3
F38A1.8	1	7	6	10	6	1	-3
M05D6.2		4	3	7	4	1	-3
C44C1.2		3	2	6	3	1	-3
F57F5.4a		1		4	1	1	-3
K07A3.1		1		4	1	1	-3
M04F3.1		1		4	1	1	-3
ZK945.2		1		4	1	1	-3
H05C05.1c	114	152	126	156	38	26	-4
R74.1	8	48	33	52	40	15	-4
Y41E3.10a	7	12		16	5	12	-4
T23B5.3d	15	19	9	23	4	10	-4
W01B11.3	4	43	35	47	39	8	-4
C43E11.3a		17	9	21	17	8	-4
F40F8.10		15	7	19	15	8	-4
T05F1.1a	11	33	26	37	22	7	-4
R07B1.10	2	11	4	15	9	7	-4
T09A5.11	6	37	31	41	31	6	-4
T05G5.3	6	25	21	29	19	4	-4
Y18D10A.5		15	12	19	15	3	-4
H34C03.2	1	14	11	18	13	3	-4
Y75B12B.5		4	1	8	4	3	-4
K08F11.3		8	6	12	8	2	-4
K04A8.6		3	1	7	3	2	-4
H19N07.1a		2		6	2	2	-4
T05H10.1		2		6	2	2	-4
F37C4.6a		4	3	8	4	1	-4
W04D2.1a		1		5	1	1	-4
F26F4.7	47	180	160	185	133	20	-5
Y60A3A.13a	6	54	35	59	48	19	-5
F26E4.8a	14	77	62	82	63	15	-5
Y43B11AR.4	6	56	42	61	50	14	-5
F41H10.6a	5	40	35	45	35	5	-5
F21D5.1	3	19	14	24	16	5	-5
ZC434.8		9	4	14	9	5	-5
Y57G11C.10a		8	3	13	8	5	-5
Y39E4B.1		5	1	10	5	4	-5
C01G6.8a		4		9	4	4	-5
C42C1.11a		8	5	13	8	3	-5
W06H8.1a		4	2	9	4	2	-5
F23B12.5		2		7	2	2	-5
ZK1098.2		2		7	2	2	-5
Y47G6A.11		17	16	22	17	1	-5
C01G6.3		6	5	11	6	1	-5
C54G4.8	7	13	12	18	6	1	-5
F57B10.5		3	2	8	3	1	-5
F29D11.2	1	2	1	7	1	1	-5
ZK1248.3a		1		6	1	1	-5
VC5.3a	8	77	43	83	69	34	-6
F07A5.7a		49	18	55	49	31	-6
C29E4.3a		40	16	46	40	24	-6
Y50E8A.4a	18	177	155	183	159	22	-6
F01G10.1	8	34	20	40	26	14	-6
F59B2.3		20	10	26	20	10	-6
F10G7.8	9	63	54	69	54	9	-6
C07A9.3a	42	149	141	155	107	8	-6
C02E11.1a	13	90	82	96	77	8	-6
C04A2.3a		20	13	26	20	7	-6
C07H6.5	16	52	46	58	36	6	-6
K05C4.6a		11	6	17	11	5	-6
Y55F3AR.3a	3	14	9	20	11	5	-6
M03C11.8	2	7	3	13	5	4	-6
T27F6.5a		25	22	31	25	3	-6
Y48E1B.5		25	22	31	25	3	-6
K07A1.8	7	28	25	34	21	3	-6
R03A10.4a	4	11	9	17	7	2	-6
Y47D3A.29a		7	5	13	7	2	-6
T21B10.7	4	8	6	14	4	2	-6
Y53F4B.22a		9	8	15	9	1	-6
Y38H6C.14		1		7	1	1	-6
K02F2.2	8	72	33	79	64	39	-7
F56D2.1	9	143	126	150	134	17	-7
T04A8.14		95	80	102	95	15	-7
R07H5.8		36	25	43	36	11	-7
R11A5.4a		18	8	25	18	10	-7
F49E11.1b	7	28	22	35	21	6	-7
Y38C1AB.4		18	12	25	18	6	-7
Y38A10A.5	2	9	4	16	7	5	-7
Y50D7A.7		10	6	17	10	4	-7
C24B5.4		4		11	4	4	-7
T05C12.7		4		11	4	4	-7
F22D6.3a	1	25	22	32	24	3	-7
C36B1.4	1	3		10	2	3	-7
C25B8.4a		11	9	18	11	2	-7
C50F2.3	2	6	4	13	4	2	-7
R13H4.4a		4	2	11	4	2	-7
C23G10.3	11	21	9	29	10	12	-8
F07A11.2a	13	82	72	90	69	10	-8
F37A4.8	4	29	19	37	25	10	-8
F29F11.1	1	14	5	22	13	9	-8
F49C12.8	15	56	50	64	41	6	-8
C17G10.9a	9	47	43	55	38	4	-8
H06O01.1		6	4	14	6	2	-8
ZK632.6	3	10	9	18	7	1	-8
R04A9.2		3	2	11	3	1	-8
F58D5.1a	1	3	2	11	2	1	-8
Y48G8AL.6	14	191	139	200	177	52	-9
Y37D8A.9a	3	60	27	69	57	33	-9
Y17G7B.5a	5	62	39	71	57	23	-9
Y71G12B.9a	12	105	83	114	93	22	-9
C01B7.1a		44	29	53	44	15	-9
C05D11.1		51	38	60	51	13	-9
Y61A9LA.8		44	34	53	44	10	-9
F53G12.10	2	16	6	25	14	10	-9
Y39G10AR.8	12	53	47	62	41	6	-9
B0205.7	1	40	34	49	39	6	-9
T08B2.7a	4	12	6	21	8	6	-9
F28B3.8	2	13	9	22	11	4	-9
F55D10.1		3		12	3	3	-9
Y71A12B.1a	3	16	9	26	13	7	-10
C37H5.8	8	12	9	22	4	3	-10
C15H9.6	9	17	15	27	8	2	-10
F31E3.5	17	110	67	121	93	43	-11
W03G9.4	15	91	81	102	76	10	-11
F46F11.9a		29	19	40	29	10	-11
K02F2.3		27	17	38	27	10	-11
F42A6.9		17	8	28	17	9	-11
H28O16.1a	16	19	11	30	3	8	-11
K08C7.3a	1	5	1	16	4	4	-11
C34B2.6		37	34	48	37	3	-11
W08D2.7	2	11	9	22	9	2	-11
C11G6.1a	7	25	15	37	18	10	-12
C47B2.3	14	78	71	90	64	7	-12
C26E6.4	1	36	29	48	35	7	-12
Y48G1A.5	2	20	13	32	18	7	-12
T09F3.3	10	19	12	31	9	7	-12
R05G6.7	5	15	11	27	10	4	-12
B0393.1	6	17	16	29	11	1	-12
F48E8.6		9	8	21	9	1	-12
B0464.1	12	67	58	80	55	9	-13
W06H3.3	3	107	101	120	104	6	-13
F10G7.2	8	25	21	38	17	4	-13
Y57G11C.24g		67	49	81	67	18	-14
C05C10.6a	8	49	39	63	41	10	-14
F20G4.3	11	40	30	54	29	10	-14
F54E2.3a		17	7	31	17	10	-14
F01G4.1	8	33	25	47	25	8	-14
C26C6.2	7	15	10	29	8	5	-14
F54C9.5	3	22	18	36	19	4	-14
C36E8.5	14	69	55	84	55	14	-15
F01F1.8a	2	33	24	48	31	9	-15
D2045.6	5	21	18	36	16	3	-15
K12D12.1		13	10	28	13	3	-15
T05E11.3a	13	28	27	43	15	1	-15
E04F6.5a		3	2	18	3	1	-15
D1005.1		62	46	78	62	16	-16
C36B1.8b	59	116	100	132	57	16	-16
C41C4.8		30	22	46	30	8	-16
C06A1.1	13	37	30	53	24	7	-16
F59A6.1	2	9	6	25	7	3	-16
B0365.1	9	102	67	119	93	35	-17
Y46G5A.31	16	85	63	102	69	22	-17
K02D7.4		25	9	42	25	16	-17
Y38C1AA.2	2	37	29	54	35	8	-17
F57B9.6a	4	8	1	25	4	7	-17
Y56A3A.13		65	62	82	65	3	-17
ZK328.2	1	66	52	84	65	14	-18
T07D3.7a	3	125	122	143	122	3	-18
C50B6.2	4	5	2	23	1	3	-18
H19N07.2a	1	68	41	87	67	27	-19
C34E10.6	15	39	20	58	24	19	-19
D2023.2a	4	78	62	97	74	16	-19
C47E8.5	53	152	137	171	99	15	-19
C47E12.5a	30	112	104	131	82	8	-19
F17C11.9a	6	31	24	50	25	7	-19
K11C4.3a	2	18	15	37	16	3	-19
K01G5.7		66		86	66	66	-20
F25H5.4a	50	280	216	300	230	64	-20
R13G10.1		28		49	28	28	-21
K02F2.1a	2	62	39	83	60	23	-21
C43C3.1	25	152	115	174	127	37	-22
Y80D3A.2a	6	16	15	38	10	1	-22
F22B3.4	16	103	96	126	87	7	-23
C26E6.9a		13	9	38	13	4	-25
F38E11.5	5	83	64	110	78	19	-27
F55H2.6	1	37	24	68	36	13	-31
F26F12.7	5	27	20	58	22	7	-31
K04G7.4a	126	228	214	260	102	14	-32
B0350.2c	14	212	187	245	198	25	-33
H06O01.2	34	45	36	78	11	9	-33
Y56A3A.32a	94	200	179	234	106	21	-34
T27E9.1a	27	67	58	101	40	9	-34
W04A8.7	71	124	116	161	53	8	-37
W07E11.1a	5	21	18	58	16	3	-37
D2085.1		112	90	150	112	22	-38
R07E4.5	75	132	127	170	57	5	-38
F42C5.10	37	143	100	183	106	43	-40
C05E4.9a	3	147	106	188	144	41	-41
T22F3.3a	24	178	171	219	154	7	-41
ZC101.1		30	16	75	30	14	-45
Y39G10AR.18a	25	62	57	107	37	5	-45
T12D8.1		28	25	76	28	3	-48
C28H8.3	15	33	28	83	18	5	-50
Y76A2B.1a	201	380	310	454	179	70	-74
K07H8.6a	136	480	427	563	344	53	-83
T20G5.1	43	113	95	212	70	18	-99
F59D8.1	107	354	280	460	247	74	-106
Y71F9AL.17	25	152	118	261	127	34	-109
F59D8.2	117	344	279	466	227	65	-122
C04F6.1	114	359	291	488	245	68	-129
C26C6.1a	283	427	410	566	144	17	-139
K09F5.2	132	387	314	535	255	73	-148
C42D8.2a	185	524	400	749	339	124	-225

## Sheet: cut off by redction inboth rnai
locus	wild-type	L4440	smo-1 RNAi	pie-1 RNAi	L4440-WT	L4440-smo-1 RNAi	L444-pie-1
T04C12.4		159		154	159	159	5	0.2
T28H10.3		26	6	25	26	20	1	20
M02D8.4a		65	29	63	65	36	2	18
F45F2.10		46	31	45	46	15	1	15
F49E8.5	2	36	21	35	34	15	1	15
F18A1.5		34	22	33	34	12	1	12
C01G10.8	2	32	21	31	30	11	1	11
M106.1		79	58	77	79	21	2	10.5
R12H7.2	11	148	117	145	137	31	3	10.3333
T23G7.5a		20	10	19	20	10	1	10
F25B5.4a		122	48	114	122	74	8	9.25
T09B4.9		24	15	23	24	9	1	9
Y54E10A.3	2	22	13	21	20	9	1	9
F54H12.1a	9	24	15	23	15	9	1	9
T22B11.5a	1	139	123	137	138	16	2	8
F54A3.3	4	8		7	4	8	1	8
W02B12.10		52	38	50	52	14	2	7
K07G5.6		19	12	18	19	7	1	7
K07D4.3	3	9	2	8	6	7	1	7
T20G5.2	28	74	61	72	46	13	2	6.5
C01G8.5a	2	113	82	108	111	31	5	6.2
Y65B4BL.5	6	28	22	27	22	6	1	6
C03C10.1		19	13	18	19	6	1	6
B0495.5		9	3	8	9	6	1	6
F02A9.4a		8	2	7	8	6	1	6
T20H4.3a		7	1	6	7	6	1	6
T05H4.5	3	6		5	3	6	1	6
M03F4.2a	45	164	123	157	119	41	7	5.85714
C03D6.3a	2	65	42	61	63	23	4	5.75
F28H1.3	16	94	61	88	78	33	6	5.5
T06E6.2a		14	9	13	14	5	1	5
W01A11.5		5		4	5	5	1	5
T22D1.9	25	192	121	177	167	71	15	4.73333
F46B6.7		27	9	23	27	18	4	4.5
K07C11.2	1	28	15	25	27	13	3	4.33333
C07A12.5a		22	9	19	22	13	3	4.33333
T04C12.5		169	135	161	169	34	8	4.25
F26D10.3	29	100	64	91	71	36	9	4
R12E2.3		51	35	47	51	16	4	4
Y108G3AL.1		26	18	24	26	8	2	4
F09E5.1		18	14	17	18	4	1	4
F38A5.2a	4	17	13	16	13	4	1	4
M03C11.5		13	9	12	13	4	1	4
Y57G11C.11a		13	9	12	13	4	1	4
F36A2.6		6	2	5	6	4	1	4
Y37A1B.5a		6	2	5	6	4	1	4
C39E9.13	8	12	8	11	4	4	1	4
F08B6.3		4		3	4	4	1	4
F58G6.5a		4		3	4	4	1	4
F54F3.1a	23	266	179	244	243	87	22	3.95455
Y57A10A.18a	59	288	253	279	229	35	9	3.88889
C47D12.6a	1	70	56	66	69	14	4	3.5
Y71H2AM.11	3	18	11	16	15	7	2	3.5
F22B5.9		10	3	8	10	7	2	3.5
T12D8.9a		9	2	7	9	7	2	3.5
T27E9.7	6	112	85	104	106	27	8	3.375
F59A2.1a	2	29	9	23	27	20	6	3.33333
F35G12.10	12	54	41	50	42	13	4	3.25
K08A8.1a	11	32	19	28	21	13	4	3.25
Y71F9AL.18		14	5	11	14	9	3	3
W02D7.7		10	1	7	10	9	3	3
Y50D4C.4		10	4	8	10	6	2	3
Y56A3A.12a	3	11	5	9	8	6	2	3
T05A10.1a		6		4	6	6	2	3
Y75B8A.30		12	9	11	12	3	1	3
R05H10.3a		10	7	9	10	3	1	3
VF13D12L.1		9	6	8	9	3	1	3
Y54E2A.11a		6	3	5	6	3	1	3
F31E3.3		5	2	4	5	3	1	3
T23B5.1a		4	1	3	4	3	1	3
C14B9.7		3		2	3	3	1	3
F13D12.4a		3		2	3	3	1	3
F39H11.5		3		2	3	3	1	3
K08F11.5		3		2	3	3	1	3
T01B11.2a		3		2	3	3	1	3
K10B3.10a	4	408	369	394	404	39	14	2.78571
ZK270.2a		13	2	9	13	11	4	2.75
K04D7.1	6	59	29	48	53	30	11	2.72727
T02G5.9a	8	74	58	68	66	16	6	2.66667
F25D1.1a		12	4	9	12	8	3	2.66667
K10D2.6	2	13	5	10	11	8	3	2.66667
D1007.6		8		5	8	8	3	2.66667
C06E7.4	8	13	5	10	5	8	3	2.66667
R12C12.1a		20	7	15	20	13	5	2.6
ZC518.3a	1	47	37	43	46	10	4	2.5
W03F8.5		13	8	11	13	5	2	2.5
B0035.8		9	4	7	9	5	2	2.5
F36H1.6		6	1	4	6	5	2	2.5
F22D3.1a		5		3	5	5	2	2.5
F29B9.6		5		3	5	5	2	2.5
Y38E10A.22a	2	6	1	4	4	5	2	2.5
D1054.15a		116	74	99	116	42	17	2.47059
C09H6.1a	3	158	84	128	155	74	30	2.46667
F10B5.1		29	15	23	29	14	6	2.33333
T24H7.5b		9	2	6	9	7	3	2.33333
Y23H5A.3		9	2	6	9	7	3	2.33333
F58B3.5a	9	78	69	74	69	9	4	2.25
B0511.8		44	35	40	44	9	4	2.25
W07A8.3a		11		6	11	11	5	2.2
F32D1.5		47	32	40	47	15	7	2.14286
T03E6.7a		34	19	27	34	15	7	2.14286
Y71G12B.11a		87	31	60	87	56	27	2.07407
Y67H2A.10a	3	60	32	46	57	28	14	2
F25H2.11	1	19	1	10	18	18	9	2
Y54F10AM.4a		18		9	18	18	9	2
R06F6.12	1	30	16	23	29	14	7	2
F25H2.5	1	14		7	13	14	7	2
C27H6.8		13	1	7	13	12	6	2
Y47D3A.16		17	7	12	17	10	5	2
Y53C12A.4		14	8	11	14	6	3	2
C28D4.3	2	41	37	39	39	4	2	2
C53A5.1	6	33	29	31	27	4	2	2
K01G5.4	2	15	11	13	13	4	2	2
ZK1098.4		13	9	11	13	4	2	2
R151.3	3	10	6	8	7	4	2	2
T23G5.2a		4		2	4	4	2	2
T16G1.11		5	3	4	5	2	1	2
ZK177.4	1	5	3	4	4	2	1	2
C09D4.5	4	7	5	6	3	2	1	2
F49D11.9		3	1	2	3	2	1	2
F54B3.3		3	1	2	3	2	1	2
B0285.7		2		1	2	2	1	2
C27H6.2		2		1	2	2	1	2
F29B9.2a		2		1	2	2	1	2
F57B10.14		2		1	2	2	1	2
K12F2.1		2		1	2	2	1	2
Y111B2A.17		2		1	2	2	1	2
Y79H2A.6		2		1	2	2	1	2
ZK353.8		2		1	2	2	1	2
C36B1.5		35	16	25	35	19	10	1.9
Y48B6A.11		25	8	16	25	17	9	1.88889
F44E7.4a		124	92	107	124	32	17	1.88235
T12E12.1		22	9	15	22	13	7	1.85714
F56F3.5	7	25	14	19	18	11	6	1.83333
F57H12.1	7	25	14	19	18	11	6	1.83333
R13A5.8		13	2	7	13	11	6	1.83333
F11C3.3	3	14	3	8	11	11	6	1.83333
T07A9.6	6	89	58	72	83	31	17	1.82353
F49E12.2	3	86	15	47	83	71	39	1.82051
C25H3.9a		23	9	15	23	14	8	1.75
T05G5.7a	2	20	13	16	18	7	4	1.75
C37H5.6a		10	3	6	10	7	4	1.75
R151.7a		25	13	18	25	12	7	1.71429
B0035.9		15	3	8	15	12	7	1.71429
T04G9.5		12	2	6	12	10	6	1.66667
ZK688.9	5	12	2	6	7	10	6	1.66667
F53H1.4a		11	6	8	11	5	3	1.66667
R11E3.8a		9	4	6	9	5	3	1.66667
F52B5.6	1	8	3	5	7	5	3	1.66667
Y47D3A.26a		5		2	5	5	3	1.66667
T09E8.1a	4	5		2	1	5	3	1.66667
F41C3.5		16	3	8	16	13	8	1.625
K12C11.2	3	61	14	32	58	47	29	1.62069
C34B2.7		37	16	24	37	21	13	1.61538
Y37D8A.2	9	99	83	89	90	16	10	1.6
B0547.1		11	3	6	11	8	5	1.6
C47B2.4	1	12	4	7	11	8	5	1.6
ZC376.5		10	2	5	10	8	5	1.6
Y39A1A.6		8		3	8	8	5	1.6
K08F9.2		47	28	35	47	19	12	1.58333
H13N06.6a	1	36	25	29	35	11	7	1.57143
K07A1.12		53	32	39	53	21	14	1.5
C17H12.1		24	9	14	24	15	10	1.5
F46E10.10a	1	37	25	29	36	12	8	1.5
Y37E11AL.7a		16	4	8	16	12	8	1.5
Y57G11C.16	2	22	13	16	20	9	6	1.5
Y71G12B.24		10	4	6	10	6	4	1.5
R07E5.13		6		2	6	6	4	1.5
ZK858.3		6		2	6	6	4	1.5
Y66H1A.2a		10	7	8	10	3	2	1.5
Y61A9LA.10		7	4	5	7	3	2	1.5
ZK616.6		6	3	4	6	3	2	1.5
C06E7.1a		5	2	3	5	3	2	1.5
F35G12.11		5	2	3	5	3	2	1.5
T07D3.9a		5	2	3	5	3	2	1.5
C04G2.6		3		1	3	3	2	1.5
C38C3.5a		3		1	3	3	2	1.5
F09G2.4		3		1	3	3	2	1.5
F39B2.6		3		1	3	3	2	1.5
Y51H1A.3a		3		1	3	3	2	1.5
Y48E1B.7	24	110	82	91	86	28	19	1.47368
C03G5.1		34	18	23	34	16	11	1.45455
Y45F10D.12	5	70	40	49	65	30	21	1.42857
F40F9.6a		46	29	34	46	17	12	1.41667
F10D11.1	2	36	19	24	34	17	12	1.41667
Y48G8AL.8a		35	11	18	35	24	17	1.41176
W01A8.4		15	8	10	15	7	5	1.4
Y49E10.19		11	4	6	11	7	5	1.4
R53.4	3	24	6	11	21	18	13	1.38462
Y71H2AM.23		41	19	25	41	22	16	1.375
R05F9.6		24	13	16	24	11	8	1.375
F58G11.2a	10	232	216	220	222	16	12	1.33333
F57B10.3a		54	42	45	54	12	9	1.33333
C15H11.3a		49	37	40	49	12	9	1.33333
T27C4.4a		35	23	26	35	12	9	1.33333
F32B6.2		15	7	9	15	8	6	1.33333
F28B3.7a		13	5	7	13	8	6	1.33333
T25B9.9	12	40	36	37	28	4	3	1.33333
Y108G3AL.2		11	7	8	11	4	3	1.33333
R12B2.4		6	2	3	6	4	3	1.33333
C44C8.6		5	1	2	5	4	3	1.33333
E04A4.5		4		1	4	4	3	1.33333
T13B5.3		23	14	16	23	9	7	1.28571
B0041.2a	1	22	13	15	21	9	7	1.28571
F37D6.2a		95	63	70	95	32	25	1.28
F10E7.7		39	11	17	39	28	22	1.27273
F56F3.1	50	130	77	88	80	53	42	1.2619
F49D11.1		58	23	30	58	35	28	1.25
W09H1.6a		55	35	39	55	20	16	1.25
R10D12.14a	17	38	23	26	21	15	12	1.25
F01F1.9		12	7	8	12	5	4	1.25
F33H2.6		7	2	3	7	5	4	1.25
C05D11.11a		51	27	31	51	24	20	1.2
C01F6.6a	27	108	96	98	81	12	10	1.2
K11H12.2		48	36	38	48	12	10	1.2
C53B7.4		12	6	7	12	6	5	1.2
C15F1.7a		24	11	13	24	13	11	1.18182
Y37E3.17a		76	43	48	76	33	28	1.17857
T05G5.10a	4	41	14	18	37	27	23	1.17391
C37C3.8a		38	24	26	38	14	12	1.16667
F53C11.8		7		1	7	7	6	1.16667
R04F11.2		7		1	7	7	6	1.16667
T24C4.7		7		1	7	7	6	1.16667
R13H8.1a	5	7		1	2	7	6	1.16667
F37C12.9		16		2	16	16	14	1.14286
C53A5.3		74	66	67	74	8	7	1.14286
C39F7.4	2	23	15	16	21	8	7	1.14286
M7.1		10	2	3	10	8	7	1.14286
F53F10.3		10	1	2	10	9	8	1.125
ZK994.3		19	6	7	19	13	12	1.08333
Y5F2A.4	3	33	17	18	30	16	15	1.06667
K04F10.7	38	40	24	25	2	16	15	1.06667
T05C3.5		38	18	19	38	20	19	1.05263
Y39E4A.3a		37	20	20	37	17	17	1
W07G4.4		38	22	22	38	16	16	1
F54F2.1		16	1	1	16	15	15	1
BE0003N10.3		22	8	8	22	14	14	1
F36A2.1a		58	45	45	58	13	13	1
F11A10.8		25	13	13	25	12	12	1
F28C6.3		13	1	1	13	12	12	1
F54E7.2	1	12			11	12	12	1
Y40B1A.4		15	4	4	15	11	11	1
R07E5.2		13	2	2	13	11	11	1
F14D12.2	19	66	56	56	47	10	10	1
T05E11.1	2	21	11	11	19	10	10	1
C06C3.1a		15	5	5	15	10	10	1
C44B12.1		9			9	9	9	1
W02D9.1a		12	4	4	12	8	8	1
Y56A3A.21	3	32	26	26	29	6	6	1
F46E10.9	4	16	10	10	12	6	6	1
B0025.2		8	2	2	8	6	6	1
F25D7.3a		6			6	6	6	1
K12H4.4	2	9	4	4	7	5	5	1
T04F8.1		7	2	2	7	5	5	1
Y71G12B.20a		6	1	1	6	5	5	1
B0334.15		5			5	5	5	1
C34G6.6a		5			5	5	5	1
F45E12.1a		6	2	2	6	4	4	1
F02E9.10a		5	1	1	5	4	4	1
F10G8.3		4			4	4	4	1
F54C9.10		4			4	4	4	1
K10C3.6a		4			4	4	4	1
M04F3.4a		4			4	4	4	1
R06C7.3		4			4	4	4	1
T26A5.9		4			4	4	4	1
W06H3.2a		4			4	4	4	1
Y66D12A.15		4			4	4	4	1
ZK858.7		4			4	4	4	1
C18E9.4		7	4	4	7	3	3	1
R09B3.5		5	2	2	5	3	3	1
BE0003N10.1		3			3	3	3	1
C06A6.5		3			3	3	3	1
F10D11.2		3			3	3	3	1
F53H10.2a		3			3	3	3	1
F54D5.12		3			3	3	3	1
K02D10.1a		3			3	3	3	1
K04D7.3a		3			3	3	3	1
M01E10.2a		3			3	3	3	1
R07H5.2a		3			3	3	3	1
R11A8.4a		3			3	3	3	1
R11D1.9		3			3	3	3	1
T01C3.6		3			3	3	3	1
T23G7.1		3			3	3	3	1
Y59A8B.6		3			3	3	3	1
Y73B3A.18a		3			3	3	3	1
Y60A3A.9	1	11	9	9	10	2	2	1
R10E4.2b		8	6	6	8	2	2	1
Y37E3.7		6	4	4	6	2	2	1
F57C7.1a		5	3	3	5	2	2	1
F52F12.3		3	1	1	3	2	2	1
F59E10.1		3	1	1	3	2	2	1
B0035.14a		2			2	2	2	1
B0035.16		2			2	2	2	1
B0412.4		2			2	2	2	1
C09B8.7a		2			2	2	2	1
C14B9.6a		2			2	2	2	1
C17G10.8		2			2	2	2	1
C26E6.2		2			2	2	2	1
C26F1.7a		2			2	2	2	1
C27A2.2a		2			2	2	2	1
C34B2.10		2			2	2	2	1
C35D10.6		2			2	2	2	1
C37A2.7		2			2	2	2	1
C41H7.3		2			2	2	2	1
C53B4.7a		2			2	2	2	1
D1081.7a		2			2	2	2	1
F01G10.7		2			2	2	2	1
F20G2.3a		2			2	2	2	1
F23H12.4a		2			2	2	2	1
F25F2.2a		2			2	2	2	1
F32D8.5a		2			2	2	2	1
F35G2.4		2			2	2	2	1
F41G4.2a		2			2	2	2	1
F44F1.7		2			2	2	2	1
F53A2.6a		2			2	2	2	1
F54D8.2		2			2	2	2	1
F54F2.9		2			2	2	2	1
H24K24.3a		2			2	2	2	1
JC8.6a		2			2	2	2	1
K04G2.5		2			2	2	2	1
K07C11.7a		2			2	2	2	1
K12H6.1		2			2	2	2	1
M01F1.2		2			2	2	2	1
M106.5		2			2	2	2	1
R74.5a		2			2	2	2	1
T22D1.10		2			2	2	2	1
Y105C5B.21a		2			2	2	2	1
Y105E8A.16		2			2	2	2	1
Y105E8A.2		2			2	2	2	1
Y18D10A.20		2			2	2	2	1
Y38A8.2		2			2	2	2	1
Y38F2AR.9	2	4	2	2	2	2	2	1
Y44E3A.6a		2			2	2	2	1
Y48G1A.3		2			2	2	2	1
Y53F4B.9		2			2	2	2	1
Y57G11C.13		2			2	2	2	1
ZC404.8		2			2	2	2	1
C35C5.3a	6	30	29	29	24	1	1	1
Y113G7A.9a		23	22	22	23	1	1	1
T02G5.8		9	8	8	9	1	1	1
Y49A3A.2		6	5	5	6	1	1	1
W09C5.2		5	4	4	5	1	1	1
F07D10.1	1	5	4	4	4	1	1	1
ZK863.3		4	3	3	4	1	1	1
C50E3.5		2	1	1	2	1	1	1
F09E5.2		2	1	1	2	1	1	1
F20D1.6		2	1	1	2	1	1	1
F38A5.1a		2	1	1	2	1	1	1
H27M09.1		2	1	1	2	1	1	1
W04G3.5a		2	1	1	2	1	1	1
Y119D3B.11		2	1	1	2	1	1	1
B0303.9		1			1	1	1	1
B0495.9		1			1	1	1	1
C01G10.11a		1			1	1	1	1
C01G5.6		1			1	1	1	1
C01H6.7a		1			1	1	1	1
C03D6.4		1			1	1	1	1
C06B8.1		1			1	1	1	1
C06G3.10		1			1	1	1	1
C07D10.5		1			1	1	1	1
C09G12.8a		1			1	1	1	1
C09G5.2a		1			1	1	1	1
C14A4.5		1			1	1	1	1
C32E8.11		1			1	1	1	1
C50F4.16		1			1	1	1	1
D2085.3		1			1	1	1	1
F01F1.6		1			1	1	1	1
F09E5.3		1			1	1	1	1
F15C11.1		1			1	1	1	1
F18C12.2a		1			1	1	1	1
F18E3.7a		1			1	1	1	1
F20B6.8a		1			1	1	1	1
F20C5.5		1			1	1	1	1
F20D6.4a		1			1	1	1	1
F21C3.3		1			1	1	1	1
F32A7.5a		1			1	1	1	1
F38H4.6		1			1	1	1	1
F40G9.3		1			1	1	1	1
F41E6.13a		1			1	1	1	1
F41E6.6		1			1	1	1	1
F42A10.4a		1			1	1	1	1
F44C4.4a		1			1	1	1	1
F55A4.1		1			1	1	1	1
F55A4.5		1			1	1	1	1
K02F6.7		1			1	1	1	1
K05C4.1		1			1	1	1	1
K09H11.15		1			1	1	1	1
K12H4.5		1			1	1	1	1
M57.2a		1			1	1	1	1
M6.1a		1			1	1	1	1
M70.5		1			1	1	1	1
R07B1.1		1			1	1	1	1
R17.2		1			1	1	1	1
T04B2.2a		1			1	1	1	1
T10B10.3		1			1	1	1	1
T14B4.3		1			1	1	1	1
T15H9.4		1			1	1	1	1
T20D4.11		1			1	1	1	1
T21H8.5		1			1	1	1	1
T25G12.4		1			1	1	1	1
W03F9.1		1			1	1	1	1
W09G10.4a		1			1	1	1	1
Y18D10A.19		1			1	1	1	1
Y26E6A.1		1			1	1	1	1
Y38C1BA.2a		1			1	1	1	1
Y39B6A.20		1			1	1	1	1
Y45F3A.3a		1			1	1	1	1
Y47D3B.10		1			1	1	1	1
Y48B6A.12		1			1	1	1	1
Y48E1B.10		1			1	1	1	1
Y48G8AL.10		1			1	1	1	1
Y51H1A.5		1			1	1	1	1
Y54E10BR.6		1			1	1	1	1
Y54E2A.2		1			1	1	1	1
Y54F10AM.2a		1			1	1	1	1
Y59E9AL.7		1			1	1	1	1
Y66D12A.23		1			1	1	1	1
Y69A2AL.1		1			1	1	1	1
Y71G12B.8		1			1	1	1	1
Y92C3B.2a		1			1	1	1	1
ZC250.1a		1			1	1	1	1
ZC373.1a		1			1	1	1	1
ZC395.2		1			1	1	1	1
ZK1248.10		1			1	1	1	1
ZK1320.9		1			1	1	1	1
ZK287.1a		1			1	1	1	1
ZK328.1a		1			1	1	1	1
ZK632.4		1			1	1	1	1
C44B7.10	4	201	156	155	197	45	46	0.978261
F09E5.15a	2	27	10	9	25	17	18	0.944444
Y41D4A.5		24	11	10	24	13	14	0.928571
W04D2.4	32	93	82	81	61	11	12	0.916667
C08H9.2a	2	288	234	229	286	54	59	0.915254
F52G2.2a		22	13	12	22	9	10	0.9
Y54H5A.1		14	5	4	14	9	10	0.9
B0336.2	7	25	17	16	18	8	9	0.888889
E01A2.2a		12	4	3	12	8	9	0.888889
C05D11.12		11	4	3	11	7	8	0.875
E02H1.2		10	3	2	10	7	8	0.875
F56B3.11a		8	1		8	7	8	0.875
M03D4.4a		31	19	17	31	12	14	0.857143
F28C6.7a		8	2	1	8	6	7	0.857143
F13D11.2a		90	64	59	90	26	31	0.83871
F26B1.3	10	42	37	36	32	5	6	0.833333
Y71F9AM.6	6	22	17	16	16	5	6	0.833333
F42G8.10a	1	14	9	8	13	5	6	0.833333
F38E11.3		8	3	2	8	5	6	0.833333
T05F1.6		60	37	32	60	23	28	0.821429
K02B2.5	1	11	2		10	9	11	0.818182
C46A5.9		20	8	5	20	12	15	0.8
R08C7.3		18	6	3	18	12	15	0.8
K08F4.2	5	34	30	29	29	4	5	0.8
C07D8.6	1	26	22	21	25	4	5	0.8
C48G7.3a		7	3	2	7	4	5	0.8
T05H10.6a	2	9	5	4	7	4	5	0.8
T18D3.1	1	78	71	69	77	7	9	0.777778
F26D10.10		36	29	27	36	7	9	0.777778
F13B10.2a	12	1159	926	857	1147	233	302	0.771523
W09C5.1		35	25	22	35	10	13	0.769231
T21C9.5a	5	36	18	12	31	18	24	0.75
F18A1.2a		13	4	1	13	9	12	0.75
F09B9.2a		16	10	8	16	6	8	0.75
ZK1151.1a		10	4	2	10	6	8	0.75
F52B11.3	1	8	2		7	6	8	0.75
T20D3.7a		11	8	7	11	3	4	0.75
F53F10.4	3	11	8	7	8	3	4	0.75
F39B2.10		6	3	2	6	3	4	0.75
Y57A10A.26		6	3	2	6	3	4	0.75
B0336.10		5	2	1	5	3	4	0.75
C02F5.6a		5	2	1	5	3	4	0.75
Y48B6A.1		4	1		4	3	4	0.75
W08E3.2	3	35	16	9	32	19	26	0.730769
C42D4.1	30	42	24	16	12	18	26	0.692308
D1046.2		19	10	6	19	9	13	0.692308
C25B8.3a	5	141	121	112	136	20	29	0.689655
F52D1.1		109	68	49	109	41	60	0.683333
Y48G1C.2		21	13	9	21	8	12	0.666667
C50D2.8	5	35	29	26	30	6	9	0.666667
Y55F3AM.15		26	20	17	26	6	9	0.666667
F44G4.2		10	4	1	10	6	9	0.666667
Y113G7A.3	2	27	23	21	25	4	6	0.666667
Y18D10A.17		19	15	13	19	4	6	0.666667
C25E10.12		8	4	2	8	4	6	0.666667
C34F6.8		6	2		6	4	6	0.666667
D1069.3a		7	5	4	7	2	3	0.666667
Y43F8C.7		5	3	2	5	2	3	0.666667
F08G12.2		3	1		3	2	3	0.666667
T19B4.1		3	1		3	2	3	0.666667
C15C7.4	1	3	1		2	2	3	0.666667
F35F11.1		32	23	18	32	9	14	0.642857
Y57A10C.6		19	12	8	19	7	11	0.636364
F52E1.1	5	19	14	11	14	5	8	0.625
EEED8.8		41	28	20	41	13	21	0.619048
C36A4.4	1	45	36	30	44	9	15	0.6
F44B9.6		12	9	7	12	3	5	0.6
C08B11.2		9	6	4	9	3	5	0.6
C06E7.3a		5	2		5	3	5	0.6
R11A8.5		5	2		5	3	5	0.6
W09C5.8		20	10	3	20	10	17	0.588235
F54C9.1		24	10		24	14	24	0.583333
Y53C12B.3a		27	15	6	27	12	21	0.571429
F42C5.8	7	44	36	30	37	8	14	0.571429
C14F11.6		14	6		14	8	14	0.571429
B0303.3		22	18	15	22	4	7	0.571429
Y73B6BL.5a	10	17	12	8	7	5	9	0.555556
M88.5a	106	350	319	293	244	31	57	0.54386
E04A4.8		60	46	33	60	14	27	0.518519
K07A12.3	1	16	13	10	15	3	6	0.5
C16A3.10a		19	17	15	19	2	4	0.5
Y77E11A.7a		18	16	14	18	2	4	0.5
W03C9.3		5	3	1	5	2	4	0.5
C18F3.2a		4	2		4	2	4	0.5
F40F11.1		4	2		4	2	4	0.5
Y40B1B.6		5	4	3	5	1	2	0.5
Y37E11AL.8		4	3	2	4	1	2	0.5
Y37A1B.2b		3	2	1	3	1	2	0.5
Y48G1C.7		3	2	1	3	1	2	0.5
Y55H10A.1	3	6	5	4	3	1	2	0.5
F46A9.6		2	1		2	1	2	0.5
F46B6.5a		2	1		2	1	2	0.5
T19C3.8		2	1		2	1	2	0.5
Y106G6E.6		2	1		2	1	2	0.5
F52D10.3a	15	57	50	42	42	7	15	0.466667
C32E8.2a	3	26	21	15	23	5	11	0.454545
K07C5.4		22	18	13	22	4	9	0.444444
F56E10.4	3	16	12	7	13	4	9	0.444444	0.666667
M05D6.6		11	7	2	11	4	9	0.444444
K07A1.11		38	35	31	38	3	7	0.428571
K12H4.3		10	7	3	10	3	7	0.428571
F39H11.2a		50	45	38	50	5	12	0.416667
R06C7.1		19	14	7	19	5	12	0.416667
M142.2	2	12	7		10	5	12	0.416667		cut-off: difference>60%
R02D3.1a		17	10		17	7	17	0.411765
F27D4.5		17	13	7	17	4	10	0.4
ZK1073.1		11	9	6	11	2	5	0.4
R07G3.1		7	5	2	7	2	5	0.4
ZK973.3		54	51	46	54	3	8	0.375
F32H2.5	20	189	164	122	169	25	67	0.373134
F28D1.1		34	30	23	34	4	11	0.363636
T11B7.4b		23	18	8	23	5	15	0.333333
F59B8.2a	1	22	19	13	21	3	9	0.333333
T10B5.5a	10	33	31	27	23	2	6	0.333333
R11H6.1		14	12	8	14	2	6	0.333333
C17D12.2		8	6	2	8	2	6	0.333333
Y105E8A.26a		7	5	1	7	2	6	0.333333
F13E6.4		6	4		6	2	6	0.333333
R148.5a		6	4		6	2	6	0.333333
M01E11.7a		25	24	22	25	1	3	0.333333
C34F11.3a		11	10	8	11	1	3	0.333333
K11E8.1d		7	6	4	7	1	3	0.333333
C02F5.9		3	2		3	1	3	0.333333
C06G4.1		3	2		3	1	3	0.333333
M01D7.6		3	2		3	1	3	0.333333
T05F1.3		3	2		3	1	3	0.333333
R07G3.7a		17	13	4	17	4	13	0.307692
B0250.1	15	1250	1149	918	1235	101	332	0.304217
F59E12.4a		51	48	41	51	3	10	0.3
M106.4a		22	20	15	22	2	7	0.285714
F43D9.4	9	230	202	119	221	28	111	0.252252
B0361.3		22	21	18	22	1	4	0.25
F28D1.7		8	7	4	8	1	4	0.25
F36A2.7		7	6	3	7	1	4	0.25
M01E11.4b		23	19	6	23	4	17	0.235294
F59E12.5a		52	49	39	52	3	13	0.230769
F11A10.1a		34	33	29	34	1	5	0.2
Y39A3CL.6		11	10	6	11	1	5	0.2
ZK370.8		10	9	5	10	1	5	0.2
F32H2.9		5	4		5	1	5	0.2
F49H12.1a		34	31	9	34	3	25	0.12
C01F1.3a		16	15	7	16	1	9	0.111111
Y17G7B.3		33	32	22	33	1	11	0.0909091
ZK353.9	3	34	33	23	31	1	11	0.0909091
Y54G11A.13a		63	62	43	63	1	20	0.05
Y37E3.8a	85	112	109	38	27	3	74	0.0405405
Y54G11A.6		63	62	38	63	1	25	0.04
