# Supplementary material for: PIE-1 SUMOylation promotes germline fates and piRNA-dependent silencing in C. elegans
Source: eLife. 2021 May 18;10:e63300. doi: 10.7554/eLife.63300 (PMC8131105; doi:10.7554/eLife.63300)
Supplement: Figure 5—source data 1. [file elife-63300-fig5-data1.xlsx]

## Sheet: Sheet1
Immunostaining quantification by image J								Control signal	CTCF	CTCF/Area
		Area	Mean	Min	Max	IntDen	RawIntDen	Background average*Area	InDen-Control signal
WT
Oocyte -1	1	0.499	76.002	22	255	37.919	349459	0.558381	37.3606	74.871
Oocyte -2	2	0.394	36.461	25	90	14.369	132426	0.440886	13.9281	35.3505
Oocyte -3	3	0.334	35.248	24	89	11.765	108422	0.373746	11.3913	34.1056
Ooycte -4	4	0.377	25.624	20	37	9.648	88916	0.421863	9.22614	24.4725
Oocyte -5	5	0.235	21.549	19	25	5.065	46675	0.262965	4.80204	20.4342
Background control1	6	1.555	1.104	0	3	1.716	15818
Background control2	7	1.063	1.222	0	4	1.299	11969
Background control3	8	2.494	1.031	0	3	2.571	23696
		Background average	1.119
K68R
Oocyte -1	9	0.734	113.959	41	255	83.652	770935	1.44843	82.2036	111.994
Oocyte -2	10	0.402	118.937	33	255	47.866	441136	0.79328	47.0727	117.096
Oocyte -3	11	0.351	99.517	37	255	34.9	321638	0.69264	34.2074	97.4569
Ooycte -4	12	0.266	105.263	29	255	28.006	258106	0.524907	27.4811	103.312
Oocyte -5	13	0.199	115.734	37	255	23.056	212487	0.392693	22.6633	113.886
Background control1	14	1.288	1.136	1	2	1.463	13485
Background control2	15	2.898	1.007	1	2	2.92	26912
Background control3	16	3.86	1.449	1	4	5.595	51562
		Background average	1.19733
PIE-1::Degron::GFP
Oocyte -1	17	0.621	136.675	76	255	84.888	782329	1.30741	84.267	135.696
Oocyte -2	18	0.761	157.375	73	255	119.773	1103830	1.60216	119.012	156.389
Oocyte -3	19	0.355	166.764	102	255	59.225	545817	0.747393	58.87	165.831
Ooycte -4	20	0.316	142.18	71	255	44.987	414598	0.665285	44.671	141.364
Oocyte -5	21	0.338	122.463	79	213	41.339	380982	0.711603	41.001	121.305
Background control1	22	3.393	1.499	1	2	5.086	46876
Background control2	23	2.122	2.799	2	5	5.939	54735
Background control3	24	1.524	2.018	1	3	3.076	28345
		Background average	2.10533
