# Supplementary material for: PIE-1 SUMOylation promotes germline fates and piRNA-dependent silencing in C. elegans
Source: eLife. 2021 May 18;10:e63300. doi: 10.7554/eLife.63300 (PMC8131105; doi:10.7554/eLife.63300)
Supplement: Supplementary file 2. [file elife-63300-supp2.xlsx]

## Sheet: Sheet1
Supplementary File 2. List of SUMO-conjugated worm proteins identified by affinity chromatography and mass spectrometry.
locus	Gene	# of spectra			# of spectra
		wild-type	his10::smo-1		L4440-wt	L4440-smo-1 RNAi
			L4440	smo-1 RNAi
F13B10.2a	rpl-3	12	1159	926	1147	233
T04C12.4	act-3		159		159	159
C42D8.2a	vit-2	185	524	400	339	124
B0250.1	rpl-2	15	1250	1149	1235	101
F54F3.1a	nid-1	23	266	179	243	87
F59D8.1	vit-3	107	354	280	247	74
C09H6.1a	spr-4	3	158	84	155	74
F25B5.4a	ubq-1		122	48	122	74
K09F5.2	vit-1	132	387	314	255	73
T22D1.9	rpn-1	25	192	121	167	71
F49E12.2	dod-23	3	86	15	83	71
Y76A2B.1a	pod-1	201	380	310	179	70
C04F6.1	vit-5	114	359	291	245	68
K01G5.7	tbb-1		66		66	66
F59D8.2	vit-4	117	344	279	227	65
F25H5.4a	eef-2	50	280	216	230	64
Y71G12B.11a	tln-1		87	31	87	56
C08H9.2a	vgln-1	2	288	234	286	54
K07H8.6a	vit-6	136	480	427	344	53
F56F3.1	ifet-1	50	130	77	80	53
Y48G8AL.6	smg-2	14	191	139	177	52
K12C11.2	smo-1	3	61	14	58	47
C44B7.10	acer-1	4	201	156	197	45
F42C5.10	ttm-4	37	143	100	106	43
F31E3.5	eef-1A.1	17	110	67	93	43
D1054.15a	plrg-1		116	74	116	42
C05E4.9a	icl-1	3	147	106	144	41
M03F4.2a	act-4	45	164	123	119	41
F52D1.1	aagr-4		109	68	109	41
K10B3.10a	spc-1	4	408	369	404	39
K02F2.2	ahcy-1	8	72	33	64	39
C43C3.1	ifp-1	25	152	115	127	37
F26D10.3	hsp-1	29	100	64	71	36
M02D8.4a	asns-2		65	29	65	36
Y57A10A.18a	pqn-87	59	288	253	229	35
B0365.1	acly-2	9	102	67	93	35
F49D11.1	prp-17		58	23	58	35
T04C12.5	act-2		169	135	169	34
Y71F9AL.17	copa-1	25	152	118	127	34
VC5.3a	npa-1	8	77	43	69	34
F28H1.3	aars-2	16	94	61	78	33
Y37E3.17a			76	43	76	33
Y37D8A.9a	mrg-1	3	60	27	57	33
F44E7.4a			124	92	124	32
F37D6.2a	row-1		95	63	95	32
M88.5a	zbp-1	106	350	319	244	31
R12H7.2	asp-4	11	148	117	137	31
C01G8.5a	erm-1	2	113	82	111	31
T07A9.6	daf-18	6	89	58	83	31
F07A5.7a	unc-15		49	18	49	31
Y45F10D.12	rpl-18	5	70	40	65	30
K04D7.1	rack-1	6	59	29	53	30
Y59A8A.3	tcc-1	23	57	27	34	30
F43D9.4	sip-1	9	230	202	221	28
Y48E1B.7	lin-38	24	110	82	86	28
Y67H2A.10a		3	60	32	57	28
F10E7.7	rpl-33		39	11	39	28
R13G10.1	dpy-27		28		28	28
T27E9.7	abcf-2	6	112	85	106	27
H19N07.2a	math-33	1	68	41	67	27
T05G5.10a	iff-1	4	41	14	37	27
F13D11.2a	hbl-1		90	64	90	26
Y41E3.4a	qars-1	5	64	38	59	26
H05C05.1c		114	152	126	38	26
B0350.2c	unc-44	14	212	187	198	25
F32H2.5	fasn-1	20	189	164	169	25
T23G5.1	rnr-1	3	125	101	122	24
C05D11.11a	mel-32		51	27	51	24
C29E4.3a	ran-2		40	16	40	24
Y48G8AL.8a	rpl-17		35	11	35	24
C03D6.3a	cel-1	2	65	42	63	23
K02F2.1a	dpf-3	2	62	39	60	23
T05F1.6	hsr-9		60	37	60	23
Y17G7B.5a	mcm-2	5	62	39	57	23
Y50E8A.4a	unc-61	18	177	155	159	22
D2085.1	pyr-1		112	90	112	22
Y71G12B.9a	lin-65	12	105	83	93	22
Y46G5A.31	gsy-1	16	85	63	69	22
Y71H2AM.23	tufm-1		41	19	41	22
Y56A3A.32a	wah-1	94	200	179	106	21
M106.1	mix-1		79	58	79	21
K07A1.12	lin-53		53	32	53	21
C34B2.7	sdha-2		37	16	37	21
C25B8.3a	cpr-6	5	141	121	136	20
F26F4.7	nhl-2	47	180	160	133	20
W09H1.6a	lec-1		55	35	55	20
T05C3.5	dnj-19		38	18	38	20
F59A2.1a	npp-9	2	29	9	27	20
T28H10.3			26	6	26	20
W08E12.7			26	6	26	20
F38E11.5	copb-2	5	83	64	78	19
ZK829.4	gdh-1	6	75	56	69	19
Y60A3A.13a	fars-2	6	54	35	48	19
K08F9.2	aipl-1		47	28	47	19
C36B1.5	prp-4		35	16	35	19
K01C8.10	cct-4	1	36	17	35	19
F25H5.3a	pyk-1	2	36	17	34	19
W08E3.2	casc-3	3	35	16	32	19
C34E10.6	atp-2	15	39	20	24	19
T20G5.1	chc-1	43	113	95	70	18
Y57G11C.24g	eps-8		67	49	67	18
F02E9.9a	dpt-1	17	59	41	42	18
T21C9.5a	lpd-9	5	36	18	31	18
F46B6.7	ztf-7		27	9	27	18
R53.4	R53.4	3	24	6	21	18
F25H2.11	tct-1	1	19	1	18	18
Y54F10AM.4a	ceh-44		18		18	18
C42D4.1		30	42	24	12	18
C26C6.1a	pbrm-1	283	427	410	144	17
F56D2.1	ucr-1	9	143	126	134	17
F40F9.6a	aagr-3		46	29	46	17
Y39E4A.3a	bckd-1A		37	20	37	17
F10D11.1	sod-2	2	36	19	34	17
F09E5.15a	prdx-2	2	27	10	25	17
Y48B6A.11	jmjd-2		25	8	25	17
F58G11.2a	rde-12	10	232	216	222	16
T22B11.5a	ogdh-1	1	139	123	138	16
Y37D8A.2		9	99	83	90	16
D2023.2a	pyc-1	4	78	62	74	16
T02G5.9a	kars-1	8	74	58	66	16
D1005.1	acly-1		62	46	62	16
C36B1.8b	gls-1	59	116	100	57	16
R12E2.3	rpn-8		51	35	51	16
R04E5.10a	ifd-1		40	24	40	16
W07G4.4	lap-2		38	22	38	16
C03G5.1	sdha-1		34	18	34	16
Y5F2A.4		3	33	17	30	16
K02D7.4	dsc-4		25	9	25	16
Y39G10AR.14	mcm-4		19	3	19	16
F37C12.9	rps-14		16		16	16
K04F10.7		38	40	24	2	16
C47E8.5	daf-21	53	152	137	99	15
T04A8.14	emb-5		95	80	95	15
C49H3.5a	ntl-4		66	51	66	15
F26E4.8a	tba-1	14	77	62	63	15
F32D1.5			47	32	47	15
F45F2.10			46	31	46	15
C01B7.1a	sup-37		44	29	44	15
R74.1	lars-1	8	48	33	40	15
F49E8.5	dif-1	2	36	21	34	15
T03E6.7a	cpl-1		34	19	34	15
C17H12.1	dyci-1		24	9	24	15
R10D12.14a	sao-1	17	38	23	21	15
Y106G6H.2a	pab-1	3	23	8	20	15
F54F2.1	pat-2		16	1	16	15
K04G7.4a	nuo-4	126	228	214	102	14
C47D12.6a	tars-1	1	70	56	69	14
ZK328.2	eftu-2	1	66	52	65	14
E04A4.8	rpl-20		60	46	60	14
C36E8.5	tbb-2	14	69	55	55	14
W02B12.10	metl-1		52	38	52	14
Y43B11AR.4	rps-4	6	56	42	50	14
C37C3.8a	tag-253		38	24	38	14
ZC101.1			30	16	30	14
F10B5.1	rpl-10		29	15	29	14
R06F6.12		1	30	16	29	14
F01G10.1	tkt-1	8	34	20	26	14
F54C9.1	iff-2		24	10	24	14
C25H3.9a			23	9	23	14
BE0003N10.3			22	8	22	14
ZC434.5	ears-1		22	8	22	14
F25H2.5	ndk-1	1	14		13	14
F36A2.1a	cids-2		58	45	58	13
C05D11.1			51	38	51	13
T20G5.2	cts-1	28	74	61	46	13
F35G12.10	asb-1	12	54	41	42	13
EEED8.8	ndx-6		41	28	41	13
F55H2.6	clu-1	1	37	24	36	13
K07C11.2	air-1	1	28	15	27	13
F32D1.10	mcm-7	5	31	18	26	13
C15F1.7a	sod-1		24	11	24	13
Y41D4A.5	ptpn-22		24	11	24	13
C07A12.5a	spr-3		22	9	22	13
T12E12.1	ari-2		22	9	22	13
K08A8.1a	mek-1	11	32	19	21	13
R12C12.1a	gldc-1		20	7	20	13
ZK994.3	pxn-1		19	6	19	13
F41C3.5	ctsa-1.1		16	3	16	13
C01F6.6a	nrfl-1	27	108	96	81	12
F57B10.3a	ipgm-1		54	42	54	12
C15H11.3a	nxf-1		49	37	49	12
K11H12.2	rpl-15		48	36	48	12
F46E10.10a	mdh-1	1	37	25	36	12
T27C4.4a	lin-40		35	23	35	12
F18A1.5	rpa-1		34	22	34	12
M03D4.4a			31	19	31	12
Y53C12B.3a	nos-3		27	15	27	12
F11A10.8	cpsf-4		25	13	25	12
R151.7a	hsp-75		25	13	25	12
C46A5.9	hcf-1		20	8	20	12
R08C7.3	htz-1		18	6	18	12
Y37E11AL.7a	map-1		16	4	16	12
B0035.9	his-46		15	3	15	12
C27H6.8			13	1	13	12
F28C6.3	cpf-1		13	1	13	12
F54E7.2	rps-12	1	12		11	12
C23G10.3	rps-3	11	21	9	10	12
Y41E3.10a	eef-1B.2	7	12		5	12
W04D2.4		32	93	82	61	11
R07H5.8	adk-1		36	25	36	11
H13N06.6a	tbh-1	1	36	25	35	11
C01G10.8	ahsa-1	2	32	21	30	11
R05F9.6			24	13	24	11
F56F3.5	rps-1	7	25	14	18	11
F57H12.1	arf-3	7	25	14	18	11
Y40B1A.4	sptf-3		15	4	15	11
R07E5.2	prdx-3		13	2	13	11
R13A5.8	rpl-9		13	2	13	11
ZK270.2a	frm-1		13	2	13	11
F52E4.1a	pccb-1	5	17	6	12	11
F11C3.3	unc-54	3	14	3	11	11
W07A8.3a	dnj-25		11		11	11
W03G9.4	app-1	15	91	81	76	10
F07A11.2a	gfat-1	13	82	72	69	10
F14D12.2	unc-97	19	66	56	47	10
ZC518.3a	ccr-4	1	47	37	46	10
Y61A9LA.8	sut-2		44	34	44	10
C05C10.6a	ufd-3	8	49	39	41	10
W09C5.1			35	25	35	10
F20G4.3	nmy-2	11	40	30	29	10
F46F11.9a	trpp-8		29	19	29	10
K02F2.3	teg-4		27	17	27	10
F37A4.8	isw-1	4	29	19	25	10
F02E8.1	asb-2	1	23	13	22	10
F59B2.3			20	10	20	10
T23G7.5a	pir-1		20	10	20	10
W09C5.8	cox-4		20	10	20	10
T05E11.1	rps-5	2	21	11	19	10
C11G6.1a	taf-3	7	25	15	18	10
R11A5.4a	pck-2		18	8	18	10
F54E2.3a	ketn-1		17	7	17	10
Y47D3A.16	rsks-1		17	7	17	10
C06C3.1a	mel-11		15	5	15	10
F53G12.10	rpl-7	2	16	6	14	10
C49H3.11	rps-2	5	18	8	13	10
T04G9.5	trap-2		12	2	12	10
C30F8.2	vha-16		10		10	10
ZK688.9		5	12	2	7	10
T23B5.3d		15	19	9	4	10
F58B3.5a	mars-1	9	78	69	69	9
B0464.1	dars-1	12	67	58	55	9
F10G7.8	rpn-5	9	63	54	54	9
B0511.8	mrps-30		44	35	44	9
C36A4.4		1	45	36	44	9
F38H4.9	let-92	6	49	40	43	9
T27E9.1a	ant-1.1	27	67	58	40	9
F35F11.1	cdc-73		32	23	32	9
F01F1.8a	cct-6	2	33	24	31	9
T09B4.9	tin-44		24	15	24	9
T13B5.3	pho-14		23	14	23	9
F52G2.2a	rsd-2		22	13	22	9
B0041.2a	ain-2	1	22	13	21	9
Y54E10A.3	txl-1	2	22	13	20	9
Y57G11C.16	rps-18	2	22	13	20	9
D1046.2			19	10	19	9
F42A6.9	elks-1		17	8	17	9
K09C8.5	pxn-2		16	7	16	9
F54H12.1a	aco-2	9	24	15	15	9
Y54H5A.1			14	5	14	9
Y71F9AL.18	pme-1		14	5	14	9
F18A1.2a	lin-26		13	4	13	9
F29F11.1	sqv-4	1	14	5	13	9
H06O01.2	chd-1	34	45	36	11	9
F53F10.3	mpc-2		10	1	10	9
K02B2.5	rps-25	1	11	2	10	9
W02D7.7	sel-9		10	1	10	9
C44B12.1	perm-2		9		9	9
C07A9.3a	tlk-1	42	149	141	107	8
C47E12.5a	uba-1	30	112	104	82	8
C02E11.1a	nra-4	13	90	82	77	8
C53A5.3	hda-1		74	66	74	8
W04A8.7	taf-1	71	124	116	53	8
W01B11.3	nol-5	4	43	35	39	8
F42C5.8	rps-8	7	44	36	37	8
Y113G7B.17	prmt-1	7	43	35	36	8
Y38C1AA.2	csn-3	2	37	29	35	8
C41C4.8	cdc-48.2		30	22	30	8
Y108G3AL.1	cul-3		26	18	26	8
F01G4.1	swsn-4	8	33	25	25	8
C39F7.4	rab-1	2	23	15	21	8
Y48G1C.2	csk-1		21	13	21	8
B0336.2	arf-1.2	7	25	17	18	8
C43E11.3a	met-1		17	9	17	8
F32B6.2	mccc-1		15	7	15	8
F40F8.10	rps-9		15	7	15	8
C14F11.6	rml-3		14	6	14	8
F28B3.7a	him-1		13	5	13	8
E01A2.2a			12	4	12	8
F25D1.1a	ppm-1		12	4	12	8
W02D9.1a	pri-2		12	4	12	8
B0547.1	csn-5		11	3	11	8
C47B2.4	pbs-2	1	12	4	11	8
K10D2.6	emb-8	2	13	5	11	8
M7.1	let-70		10	2	10	8
Y66H1B.4	spl-1		10	2	10	8
ZC376.5	trm-1		10	2	10	8
B0228.7			9	1	9	8
D1007.6	rps-10		8		8	8
Y24D9A.8a	tald-1	1	9	1	8	8
Y39A1A.6	mrpl-22		8		8	8
C06E7.4		8	13	5	5	8
F54A3.3	cct-3	4	8		4	8
H28O16.1a	atp-1	16	19	11	3	8
T22F3.3a	pygl-1	24	178	171	154	7
F22B3.4	gfat-2	16	103	96	87	7
T18D3.1		1	78	71	77	7
C47B2.3	tba-2	14	78	71	64	7
F52D10.3a	ftt-2	15	57	50	42	7
F26D10.10	gln-5		36	29	36	7
C26E6.4	rpb-2	1	36	29	35	7
F17C11.9a	eef-1G	6	31	24	25	7
C06A1.1	cdc-48.1	13	37	30	24	7
F26F12.7	let-418	5	27	20	22	7
T05F1.1a	nra-2	11	33	26	22	7
C04A2.3a	egl-27		20	13	20	7
K07G5.6	fecl-1		19	12	19	7
Y57A10C.6	daf-22		19	12	19	7
T05G5.7a	rmd-1	2	20	13	18	7
Y48G1A.5	xpo-2	2	20	13	18	7
R02D3.1a	aass-1		17	10	17	7
W01A8.4	nuo-6		15	8	15	7
Y71H2AM.11		3	18	11	15	7
Y71A12B.1a	rps-6	3	16	9	13	7
C05D11.12	let-721		11	4	11	7
Y49E10.19	ani-1		11	4	11	7
C37H5.6a	adss-1		10	3	10	7
E02H1.2	eral-1		10	3	10	7
F22B5.9	fars-3		10	3	10	7
W03D2.4	pcn-1		10	3	10	7
Y71F9B.3	yop-1		10	3	10	7
R07B1.10	lec-8	2	11	4	9	7
T09F3.3	gpd-1	10	19	12	9	7
T12D8.9a			9	2	9	7
T24H7.5b	tat-4		9	2	9	7
Y23H5A.3	pie-3		9	2	9	7
DY3.2	lmn-1		8	1	8	7
F53A2.7	acaa-2	1	9	2	8	7
F56B3.11a			8	1	8	7
Y116A8A.9a	map-2		8	1	8	7
C46F11.2a	gsr-1		7		7	7
F53C11.8	swan-1		7		7	7
R04F11.2	R04F11.2		7		7	7
T24C4.7	ztf-18		7		7	7
K07D4.3	rpn-11	3	9	2	6	7
F57B9.6a	inf-1	4	8	1	4	7
R13H8.1a	daf-16	5	7		2	7
W06H3.3	ctps-1	3	107	101	104	6
F49C12.8	rpn-7	15	56	50	41	6
Y39G10AR.8		12	53	47	41	6
B0205.7	kin-3	1	40	34	39	6
C07H6.5	cgh-1	16	52	46	36	6
T09A5.11	ostb-1	6	37	31	31	6
C50D2.8	luc-7L3	5	35	29	30	6
Y56A3A.21	trap-4	3	32	26	29	6
Y55F3AM.15	csn-4		26	20	26	6
Y65B4BL.5	acs-13	6	28	22	22	6
F49E11.1b	mbk-2	7	28	22	21	6
C03C10.1	kin-19		19	13	19	6
Y38C1AB.4	frm-5.2		18	12	18	6
F09B9.2a	unc-115		16	10	16	6
D2013.9	ttll-12		15	9	15	6
Y53C12A.4	mop-25.2		14	8	14	6
C53B7.4	asg-2		12	6	12	6
F46E10.9	dpy-11	4	16	10	12	6
F44G4.2			10	4	10	6
Y50D4C.4	sqz-6		10	4	10	6
Y71G12B.24	mppa-1		10	4	10	6
ZK1151.1a	vab-10		10	4	10	6
B0495.5			9	3	9	6
T03F6.3			9	3	9	6
B0025.2	csn-2		8	2	8	6
C09H10.3	nuo-1		8	2	8	6
F02A9.4a	mrpl-44		8	2	8	6
F28C6.7a	rpl-26		8	2	8	6
T08B2.7a	ech-1.2	4	12	6	8	6
T27A3.2	usp-5		8	2	8	6
Y56A3A.12a	faah-4	3	11	5	8	6
F52B11.3	noah-2	1	8	2	7	6
T20H4.3a	pars-1		7	1	7	6
F25D7.3a	blmp-1		6		6	6
F28H6.4			6		6	6
R07E5.13	mpc-1		6		6	6
T05A10.1a	sma-9		6		6	6
Y54G2A.17a	nprt-1	3	9	3	6	6
ZK858.3	clec-91		6		6	6
T05H4.5	hpo-19	3	6		3	6
F59G1.3	vps-35	10	12	6	2	6
R07E4.5		75	132	127	57	5
F39H11.2a	tlf-1		50	45	50	5
Y39G10AR.18a	dot-1.1	25	62	57	37	5
F41H10.6a	hda-6	5	40	35	35	5
F26B1.3	ima-2	10	42	37	32	5
W02A11.4	uba-2	2	26	21	24	5
C32E8.2a	rpl-13	3	26	21	23	5
T11B7.4b	alp-1		23	18	23	5
R06C7.1	wago-1		19	14	19	5
C28H8.3		15	33	28	18	5
F21D5.1		3	19	14	16	5
Y71F9AM.6	trap-1	6	22	17	16	5
F52E1.1	pos-1	5	19	14	14	5
T06E6.2a	cyb-3		14	9	14	5
Y53G8AR.2a	phf-15		14	9	14	5
F42G8.10a		1	14	9	13	5
W03F8.5	lam-1		13	8	13	5
F01F1.9	dnpp-1		12	7	12	5
F57C2.5a		2	14	9	12	5
F53H1.4a			11	6	11	5
K05C4.6a	hmp-2		11	6	11	5
Y55F3AR.3a	cct-8	3	14	9	11	5
M142.2	cut-6	2	12	7	10	5
B0035.8	his-48		9	4	9	5
C07A12.4a	pdi-2		9	4	9	5
R11E3.8a	dpf-5		9	4	9	5
T26A5.5a	jhdm-1		9	4	9	5
ZC434.8			9	4	9	5
C26C6.2	goa-1	7	15	10	8	5
F38E11.3	cpin-1		8	3	8	5
Y57G11C.10a	gdi-1		8	3	8	5
ZK550.3			8	3	8	5
F33H2.6			7	2	7	5
F52B5.6	rpl-25.2	1	8	3	7	5
K12H4.4	spcs-3	2	9	4	7	5
T04F8.1	sfxn-1.5		7	2	7	5
T10F2.4	prp-19		7	2	7	5
Y38A10A.5	crt-1	2	9	4	7	5
Y43F4B.5a			7	2	7	5
Y73B6BL.5a	seu-1	10	17	12	7	5
C29A12.3a	lig-1		6	1	6	5
F36H1.6	alh-3		6	1	6	5
Y71G12B.20a	mab-20		6	1	6	5
B0334.15	emc-5		5		5	5
C34G6.6a	noah-1		5		5	5
D2013.2	wdfy-2		5		5	5
F22D3.1a	ceh-38		5		5	5
F29B9.6	ubc-9		5		5	5
F43E2.8	hsp-4	8	13	8	5	5
T04C9.1a			5		5	5
W01A11.5	cpt-6		5		5	5
Y47D3A.26a	smc-3		5		5	5
Y38E10A.22a		2	6	1	4	5
Y92H12BR.3a		5	9	4	4	5
T09E8.1a	noca-1	4	5		1	5
B0041.4	rpl-4	5	64	60	59	4
T25C8.2	act-5		47	43	47	4
C28D4.3	gln-6	2	41	37	39	4
C17G10.9a	eif-3.L	9	47	43	38	4
F28D1.1	wdr-46		34	30	34	4
K08F4.2	gtbp-1	5	34	30	29	4
T25B9.9		12	40	36	28	4
C53A5.1	ril-1	6	33	29	27	4
C07D8.6		1	26	22	25	4
Y113G7A.3	sec-23	2	27	23	25	4
ZK20.5	rpn-12	6	30	26	24	4
M01E11.4b	pqn-52		23	19	23	4
B0303.3			22	18	22	4
K07C5.4	nol-56		22	18	22	4
F54C9.5	rpl-5	3	22	18	19	4
T05G5.3	cdk-1	6	25	21	19	4
Y18D10A.17	car-1		19	15	19	4
F09E5.1	pkc-3		18	14	18	4
F10G7.2	tsn-1	8	25	21	17	4
F27D4.5	tag-173		17	13	17	4
R07G3.7a			17	13	17	4
B0280.9			15	11	15	4
C26E6.9a	set-2		13	9	13	4
F38A5.2a	F38A5.2	4	17	13	13	4
F56E10.4	rps-27	3	16	12	13	4
K01G5.4	ran-1	2	15	11	13	4
M03C11.5	ymel-1		13	9	13	4
Y55B1AR.1	lec-6		13	9	13	4
Y57G11C.11a	coq-3		13	9	13	4
ZK1098.4	eif-2Balpha		13	9	13	4
F28B3.8	imb-1	2	13	9	11	4
M05D6.6	taap-1		11	7	11	4
Y108G3AL.2			11	7	11	4
R05G6.7	vdac-1	5	15	11	10	4
Y50D7A.7	ads-1		10	6	10	4
F10C1.7a	ifb-2		9	5	9	4
R12B2.5a	mdt-15		9	5	9	4
C24F3.4a	qns-1		8	4	8	4
C25E10.12			8	4	8	4
C48G7.3a	rin-1		7	3	7	4
R151.3	rpl-6	3	10	6	7	4
T05H10.6a	pdha-1	2	9	5	7	4
T09B9.4			7	3	7	4
C34F6.8	idh-2		6	2	6	4
F36A2.6	rps-15		6	2	6	4
F45E12.1a	cnep-1		6	2	6	4
R12B2.4	him-10		6	2	6	4
Y37A1B.5a	semo-1		6	2	6	4
Y48B6A.3	xrn-2		6	2	6	4
C07F11.1	tol-1		5	1	5	4
C44C8.6	mak-2		5	1	5	4
F02E9.10a			5	1	5	4
M03C11.8		2	7	3	5	4
W07A8.2a	ipla-3		5	1	5	4
Y39E4B.1	abce-1		5	1	5	4
C01G6.8a	cam-1		4		4	4
C03D6.5	asfl-1		4		4	4
C24B5.4			4		4	4
C27A12.2	szy-5		4		4	4
C39E9.13	rfc-3	8	12	8	4	4
D2030.6	prg-1		4		4	4
E04A4.5	timm-17B.1		4		4	4
F08B6.3	calu-2		4		4	4
F10G8.3	rae-1		4		4	4
F13D12.7a	gpb-1		4		4	4
F54C9.10	arl-1		4		4	4
F58G6.5a	nhr-34		4		4	4
K08C7.3a	epi-1	1	5	1	4	4
K10C3.6a	nhr-49		4		4	4
M04F3.4a			4		4	4
R06C7.3	dhp-1		4		4	4
T05C12.7	cct-1		4		4	4
T23G5.2a			4		4	4
T26A5.9	dlc-1		4		4	4
W06H3.2a	pus-1		4		4	4
Y66D12A.15	xpb-1		4		4	4
ZK858.7			4		4	4
T07D3.7a	alg-2	3	125	122	122	3
Y56A3A.13	nft-1		65	62	65	3
ZK973.3	pdp-1		54	51	54	3
F59E12.5a	npl-4.2		52	49	52	3
F59E12.4a	npl4.1		51	48	51	3
K07A1.11	rba-1		38	35	38	3
C34B2.6	lonp-1		37	34	37	3
F49H12.1a	lsy-2		34	31	34	3
T12D8.1	set-16		28	25	28	3
Y37E3.8a		85	112	109	27	3
T27F6.5a	pars-2		25	22	25	3
Y48E1B.5	mrpl-37		25	22	25	3
F22D6.3a	nars-1	1	25	22	24	3
F59B8.2a	idh-1	1	22	19	21	3
K07A1.8	ile-1	7	28	25	21	3
T04G9.3	ile-2		21	18	21	3
F57B9.10a	rpn-6.1		20	17	20	3
D2045.6	cul-1	5	21	18	16	3
K11C4.3a	unc-70	2	18	15	16	3
W07E11.1a		5	21	18	16	3
B0491.5	B0491.5	6	21	18	15	3
C08B6.9	aos-1	1	16	13	15	3
K07A12.3	asg-1	1	16	13	15	3
Y18D10A.5	gsk-3		15	12	15	3
ZC308.1a	gld-2		15	12	15	3
H34C03.2		1	14	11	13	3
K12D12.1	top-2		13	10	13	3
F44B9.6	lin-36		12	9	12	3
Y75B8A.30	pph-4.1		12	9	12	3
T20D3.7a	vps-26		11	8	11	3
F44G4.8a	dep-1		10	7	10	3
K12H4.3			10	7	10	3
R05H10.3a			10	7	10	3
Y66H1A.2a	dpm-1		10	7	10	3
C08B11.2	hda-2		9	6	9	3
M7.5	atg-7		9	6	9	3
VF13D12L.1	inos-1		9	6	9	3
C13B9.3	copd-1		8	5	8	3
C42C1.11a	ltah-1.1		8	5	8	3
F53F10.4	unc-108	3	11	8	8	3
C18E9.4			7	4	7	3
F59A6.1	nsy-1	2	9	6	7	3
Y61A9LA.10			7	4	7	3
C14F11.1a	got2.2	4	10	7	6	3
F39B2.10	dnj-12		6	3	6	3
Y43F4B.4	npp-18		6	3	6	3
Y53F4B.39a			6	3	6	3
Y54E2A.11a	eif-3.b		6	3	6	3
Y57A10A.26			6	3	6	3
ZK616.6	perm-3		6	3	6	3
B0336.10	rpl-23		5	2	5	3
C02F5.6a	henn-1		5	2	5	3
C06E7.1a	sams-3		5	2	5	3
C06E7.3a	sams-4		5	2	5	3
C34E10.5	prmt-5		5	2	5	3
F31E3.3	rfc-4		5	2	5	3
F35G12.11	erh-2		5	2	5	3
F42A10.1	abcf-3		5	2	5	3
JC8.3a	rpl-12		5	2	5	3
R09B3.5	mag-1		5	2	5	3
R11A8.5	pges-2		5	2	5	3
T07D3.9a			5	2	5	3
C37H5.8	hsp-6	8	12	9	4	3
T23B5.1a	prmt-3		4	1	4	3
Y48B6A.1			4	1	4	3
Y75B12B.5	cyn-3		4	1	4	3
BE0003N10.1			3		3	3
C04F12.4	rpl-14		3		3	3
C04G2.6	dis-3		3		3	3
C06A6.5	erp-44.2		3		3	3
C09H6.3	mau-2		3		3	3
C14B9.7	rpl-21		3		3	3
C25A1.8	clec-87		3		3	3
C38C3.5a	unc-60		3		3	3
C45G3.5	gip-2		3		3	3
F09G2.4	cpsf-2		3		3	3
F10D11.2			3		3	3
F13D12.4a	alh-8		3		3	3
F20B6.2	vha-12		3		3	3
F33D11.10			3		3	3
F39B2.6	rps-26		3		3	3
F39H11.5	pbs-7		3		3	3
F47G9.1	tmed-10		3		3	3
F53H10.2a	saeg-1		3		3	3
F54D5.12			3		3	3
F55D10.1	aman-1		3		3	3
F56H1.4	rpt-5		3		3	3
K02D10.1a			3		3	3
K03H1.2	mog-1		3		3	3
K04D7.3a	gta-1		3		3	3
K08F11.5	miro-1		3		3	3
M01E10.2a	dpy-1		3		3	3
R07H5.2a	cpt-2		3		3	3
R11A8.4a	sir-2.1		3		3	3
R11D1.9	mrpl-49		3		3	3
T01B11.2a	eppl-1		3		3	3
T01C3.6	rps-16		3		3	3
T23G7.1	dpl-1		3		3	3
W05G11.6a	pck-1		3		3	3
Y51H1A.3a			3		3	3
Y57A10A.27			3		3	3
Y59A8B.6	prp-6		3		3	3
Y73B3A.18a			3		3	3
C36B1.4	pas-4	1	3		2	3
C50B6.2	nasp-2	4	5	2	1	3
F26H9.6	rab-5	2	3		1	3
ZK1307.6	fzr-1	19	77	75	58	2
T10B5.5a	cct-7	10	33	31	23	2
M106.4a	gmps-1		22	20	22	2
C16A3.10a	oatr-1		19	17	19	2
Y77E11A.7a			18	16	18	2
F47B10.1	suca-1	2	17	15	15	2
R11H6.1	pes-9		14	12	14	2
C25B8.4a	clec-266		11	9	11	2
ZK1073.1			11	9	11	2
Y54F10BM.1	ppm-1.D		10	8	10	2
Y60A3A.9	tmed-4	1	11	9	10	2
Y6D11A.2	arx-4		10	8	10	2
LLC1.3a	dld-1	2	11	9	9	2
W08D2.7	mrt-4	2	11	9	9	2
C15H9.6	hsp-3	9	17	15	8	2
C17D12.2	unc-75		8	6	8	2
K08F11.3	cif-1		8	6	8	2
R10E4.2b	sup-26		8	6	8	2
D1069.3a	D1069.3		7	5	7	2
F56D2.6a	ddx-15		7	5	7	2
K11H3.3			7	5	7	2
R03A10.4a	nkat-3	4	11	9	7	2
R07G3.1	cdc-42		7	5	7	2
Y105E8A.26a	zoo-1		7	5	7	2
Y47D3A.29a	pola-1		7	5	7	2
F13E6.4	yap-1		6	4	6	2
H06O01.1	pdi-3		6	4	6	2
R148.5a	R148.5		6	4	6	2
Y37E3.7	rla-1		6	4	6	2
F57C7.1a	bet-2		5	3	5	2
R05D3.11	met-2		5	3	5	2
T16G1.11	eif-3.K		5	3	5	2
T26E3.3a	par-6		5	3	5	2
W03C9.3	rab-7		5	3	5	2
Y43F8C.7			5	3	5	2
Y75B12B.2	cyn-7	1	6	4	5	2
C18F3.2a	sax-7		4	2	4	2
C41G7.9a	tspo-1	1	5	3	4	2
C50F2.3	syf-1	2	6	4	4	2
F21A3.11			4	2	4	2
F35G2.1a			4	2	4	2
F40F11.1	rps-11		4	2	4	2
H15N14.1c	adr-1		4	2	4	2
R13H4.4a	hmp-1		4	2	4	2
T21B10.7	cct-2	4	8	6	4	2
W06H8.1a	rme-1		4	2	4	2
Y54F10AR.1			4	2	4	2
ZK177.4	npp-24	1	5	3	4	2
C09D4.5	rpl-19	4	7	5	3	2
F08G12.2	snrp-40.1		3	1	3	2
F23B12.6	fntb-1	6	9	7	3	2
F49D11.9	tag-296		3	1	3	2
F52F12.3	mom-4		3	1	3	2
F54B3.3	atad-3		3	1	3	2
F59E10.1	orc-2		3	1	3	2
K04A8.6	dre-1		3	1	3	2
R02D3.5	fnta-1		3	1	3	2
T19B4.1	pamn-1		3	1	3	2
T23H2.5	rab-10		3	1	3	2
Y48G8AL.5	nsun-2		3	1	3	2
ZK632.1a	mcm-6		3	1	3	2
B0035.14a	dnj-1		2		2	2
B0035.16	mttu-1		2		2	2
B0280.1a	ggtb-1		2		2	2
B0285.7	mnp-1		2		2	2
B0412.4	rps-29		2		2	2
C09B8.7a	pak-1		2		2	2
C14B9.6a	gei-8		2		2	2
C15C7.4		1	3	1	2	2
C17G10.8	dhs-6		2		2	2
C26D10.2a	hel-1	2	4	2	2	2
C26E6.2	flh-2		2		2	2
C26F1.7a	hint-3		2		2	2
C27A2.2a	rpl-22		2		2	2
C27H6.2	ruvb-1		2		2	2
C32F10.8a			2		2	2
C34B2.10	spcs-1		2		2	2
C35D10.6			2		2	2
C37A2.7			2		2	2
C41H7.3	lido-12		2		2	2
C44B7.5			2		2	2
C53B4.7a	bre-1		2		2	2
D1054.2	pas-2		2		2	2
D1081.7a			2		2	2
D2013.7	eif-3.F		2		2	2
E04D5.1a	eif-2A		2		2	2
F01G10.7	lipl-7		2		2	2
F11E6.1a	gba-3		2		2	2
F20G2.3a			2		2	2
F23B12.5	dlat-1		2		2	2
F23H12.4a	sqt-3		2		2	2
F25F2.2a	cdh-4		2		2	2
F29B9.2a	jmjd-1.2		2		2	2
F32D8.5a			2		2	2
F35G2.4	phy-2		2		2	2
F40F12.5a	cyld-1		2		2	2
F41G4.2a	cas-1		2		2	2
F44F1.7	vet-6		2		2	2
F47C12.2	clec-78		2		2	2
F53A2.6a	ife-1		2		2	2
F54D8.2	tag-174		2		2	2
F54F2.9			2		2	2
F57B10.14	ucr-11		2		2	2
H19N07.1a	erfa-3		2		2	2
H24K24.3a	adh-5		2		2	2
JC8.6a	lin-54		2		2	2
K01G5.5			2		2	2
K04G2.5	ath-1		2		2	2
K07C11.7a			2		2	2
K12F2.1	myo-3		2		2	2
K12H6.1	nhr-119		2		2	2
M01F1.2	rpl-16		2		2	2
M03C11.4	hat-1		2		2	2
M106.5	cap-2		2		2	2
R05D11.8	edc-3		2		2	2
R09A8.3	tag-147		2		2	2
R74.5a	asd-1		2		2	2
T05H10.1			2		2	2
T06E4.1	hcp-2		2		2	2
T08B2.9a	fars-1		2		2	2
T22D1.10	ruvb-2		2		2	2
T25G3.3			2		2	2
Y105C5B.21a	jac-1		2		2	2
Y105E8A.16	rps-20		2		2	2
Y105E8A.2			2		2	2
Y106G6H.3a	rpl-30		2		2	2
Y106G6H.5	pdpr-1		2		2	2
Y111B2A.17	elpc-2		2		2	2
Y18D10A.20	pfn-1		2		2	2
Y22F5A.4	lys-1		2		2	2
Y38A8.2	pbs-3		2		2	2
Y38F2AR.9	sec-61.B	2	4	2	2	2
Y41E3.1a			2		2	2
Y44E3A.6a	edc-4		2		2	2
Y48G1A.3	daf-25		2		2	2
Y49E10.3a	ppg-4.2		2		2	2
Y53F4B.9			2		2	2
Y57G11C.13	arl-8		2		2	2
Y79H2A.6	arx-3		2		2	2
ZC404.8	spn-4		2		2	2
ZK1098.2			2		2	2
ZK131.11a			2		2	2
ZK353.8	ubxn-4		2		2	2
C07G1.5	hgrs-1		107	106	107	1
W10D5.3c	gei-17	19	113	112	94	1
Y54G11A.13a	ctl-3		63	62	63	1
Y54G11A.6	ctl-1		63	62	63	1
R07G3.5	pgam-5	1	60	59	59	1
F11A10.1a	lex-1		34	33	34	1
Y17G7B.3			33	32	33	1
ZK353.9		3	34	33	31	1
M01E11.7a	tag-163		25	24	25	1
C35C5.3a	selt-1.1	6	30	29	24	1
Y113G7A.9a	dcs-1		23	22	23	1
B0361.3			22	21	22	1
Y47G6A.11	msh-6		17	16	17	1
ZK1058.1	mmcm-1	2	19	18	17	1
C01F1.3a	rml-4		16	15	16	1
T05E11.3a	enpl-1	13	28	27	15	1
B0393.1	rps-0	6	17	16	11	1
C34F11.3a	ampd-1		11	10	11	1
Y39A3CL.6	pvf-1		11	10	11	1
Y80D3A.2a	emb-4	6	16	15	10	1
ZK370.8	tomm-70		10	9	10	1
C39E9.14a	dli-1		9	8	9	1
F48E8.6	disl-2		9	8	9	1
F53C11.7	swan-2		9	8	9	1
T02G5.8	kat-1		9	8	9	1
T14G8.1	chd-3		9	8	9	1
Y53F4B.22a	arp-1		9	8	9	1
F28D1.7	rps-23		8	7	8	1
F32A11.1			8	7	8	1
M18.5	ddb-1		8	7	8	1
F36A2.7	F36A2.7		7	6	7	1
K11E8.1d	unc-43		7	6	7	1
Y82E9BR.14a			7	6	7	1
ZK632.6	cnx-1	3	10	9	7	1
C01G6.3			6	5	6	1
C54G4.8	cyc-1	7	13	12	6	1
F38A1.8		1	7	6	6	1
F56A3.4	spd-5		6	5	6	1
Y49A3A.2	vha-13		6	5	6	1
ZC477.9a	deb-1		6	5	6	1
F32H2.9	tba-6		5	4	5	1
F53A10.2a			5	4	5	1
W09C5.2	unc-59		5	4	5	1
Y40B1B.6	spr-5		5	4	5	1
ZK637.5	asna-1	1	6	5	5	1
E02H4.3a	tag-172		4	3	4	1
F07D10.1	rpl-11.2	1	5	4	4	1
F14E5.2a		4	8	7	4	1
F37C4.6a			4	3	4	1
H38K22.2a	dcn-1	3	7	6	4	1
M05D6.2			4	3	4	1
R06C7.5a	adsl-1		4	3	4	1
T10A3.1a	unc-10		4	3	4	1
Y37E11AL.8	taf-6.2		4	3	4	1
ZK863.3	elpc-3		4	3	4	1
C02F5.9	pbs-6		3	2	3	1
C06G4.1	hrpk-2		3	2	3	1
C44C1.2	chil-10		3	2	3	1
E04F6.5a	acdh-12		3	2	3	1
F57B10.5	tmed-3		3	2	3	1
M01D7.6	emr-1		3	2	3	1
R04A9.2	nrde-3		3	2	3	1
T05F1.3	rps-19		3	2	3	1
Y37A1B.2b	lst-4		3	2	3	1
Y48G1C.7			3	2	3	1
Y55H10A.1	vha-19	3	6	5	3	1
Y56A3A.20	ccf-1		3	2	3	1
ZK370.5	pdhk-2		3	2	3	1
C50E3.5			2	1	2	1
F09E5.2	algn-2		2	1	2	1
F20D1.6	rbg-1		2	1	2	1
F38A5.1a	odr-8		2	1	2	1
F46A9.6	mec-8		2	1	2	1
F46B6.5a			2	1	2	1
F53F1.2			2	1	2	1
F58D5.1a	hrp-2	1	3	2	2	1
F59A6.5			2	1	2	1
H27M09.1	sacy-1		2	1	2	1
R11H6.5			2	1	2	1
T05F1.2			2	1	2	1
T19C3.8	fem-2		2	1	2	1
W04G3.5a			2	1	2	1
Y106G6E.6	csnk-1		2	1	2	1
Y119D3B.11	orc-3		2	1	2	1
Y54E10A.6			2	1	2	1
ZK524.4			2	1	2	1
B0218.3	pmk-1		1		1	1
B0303.9	vps-33.1		1		1	1
B0403.4	pdi-6	2	3	2	1	1
B0495.9			1		1	1
C01G10.11a	unc-76		1		1	1
C01G5.6	ddi-1		1		1	1
C01H6.7a	swsn-9		1		1	1
C03D6.4	npp-14		1		1	1
C05D11.2	vps-6		1		1	1
C05G5.4	sucl-1		1		1	1
C06B8.1	nhr-150		1		1	1
C06G3.10	cogc-2		1		1	1
C07D10.5			1		1	1
C09G12.8a	ced-10		1		1	1
C09G5.2a	dph-2		1		1	1
C14A4.5	crn-5		1		1	1
C26E6.8	ula-1		1		1	1
C32E8.11	ubr-1		1		1	1
C36A4.5	maph-1.3		1		1	1
C50F4.16			1		1	1
D2085.3	eif-2Bepsilon		1		1	1
E01F3.1b	pde-3		1		1	1
F01F1.6	alh-9		1		1	1
F09E5.3			1		1	1
F15C11.1	sem-4		1		1	1
F18C12.2a	rme-8		1		1	1
F18E3.7a	ddo-2		1		1	1
F20B6.8a	hpk-1		1		1	1
F20C5.5			1		1	1
F20D6.4a	srp-7		1		1	1
F21C3.3	hint-1		1		1	1
F25B4.6	hmgs-1		1		1	1
F29D11.2	capg-1	1	2	1	1	1
F32A7.5a	maph-1.1		1		1	1
F36D3.2	nhr-54		1		1	1
F37B4.2	ifc-1		1		1	1
F38A5.7	sup-36		1		1	1
F38H4.6			1		1	1
F40G9.3	ubc-20		1		1	1
F41E6.13a	atg-18		1		1	1
F41E6.6	tag-196		1		1	1
F42A10.4a	efk-1		1		1	1
F42A6.7a	hrp-1		1		1	1
F44C4.4a	gon-14		1		1	1
F49D11.10			1		1	1
F55A4.1	sec-22		1		1	1
F55A4.5	stau-1		1		1	1
F57F5.4a	add-2		1		1	1
F58A4.4a	pri-1		1		1	1
F58E10.3a	ddx-17		1		1	1
F59E10.3	copz-1		1		1	1
H02I12.8	cyp-31A2		1		1	1
JC8.10a	unc-26		1		1	1
K02F6.7			1		1	1
K03A1.5	sur-5		1		1	1
K05C4.1	pbs-5		1		1	1
K07A3.1	fbp-1		1		1	1
K09H11.15			1		1	1
K12H4.5			1		1	1
M04F3.1	rpa-2		1		1	1
M57.2a			1		1	1
M6.1a	ifc-2		1		1	1
M70.5			1		1	1
R07B1.1	vab-15		1		1	1
R17.2	pde-12		1		1	1
T04B2.2a	frk-1		1		1	1
T10B10.3			1		1	1
T10F2.3	ulp-1		1		1	1
T13H2.4a	pqn-65		1		1	1
T14B4.3			1		1	1
T14G10.2a	pxf-1		1		1	1
T15H9.4			1		1	1
T20D4.11			1		1	1
T21H8.5			1		1	1
T25G12.4	rab-6.2		1		1	1
W03F9.1			1		1	1
W04D2.1a	atn-1		1		1	1
W07E6.1	nol-1		1		1	1
W09B6.1a	pod-2		1		1	1
W09G10.4a	apd-3		1		1	1
Y18D10A.19	fkb-2		1		1	1
Y26E6A.1	ekl-5		1		1	1
Y38C1BA.2a	snn-1		1		1	1
Y38E10A.6a	ceh-100		1		1	1
Y38H6C.14	famh-161		1		1	1
Y39B6A.20	asp-1		1		1	1
Y45F3A.3a	acdh-11		1		1	1
Y46H3A.6	gly-7		1		1	1
Y47D3B.10	dpy-18		1		1	1
Y48B6A.12	men-1		1		1	1
Y48E1B.10	gst-20		1		1	1
Y48G8AL.10			1		1	1
Y51H1A.5	hda-10		1		1	1
Y53F4B.20			1		1	1
Y54E10BR.6	rpb-7		1		1	1
Y54E2A.2	smg-9		1		1	1
Y54F10AM.2a	feh-1		1		1	1
Y54F10BM.2	iffb-1		1		1	1
Y55F3AM.4a	atg-3		1		1	1
Y59E9AL.7	nbet-1		1		1	1
Y63D3A.5	tfg-1		1		1	1
Y66D12A.23	nars-2		1		1	1
Y69A2AL.1	grd-16		1		1	1
Y71G12B.8	ddx-27		1		1	1
Y76A2B.3	acs-5		1		1	1
Y87G2A.6	cyn-15		1		1	1
Y92C3B.2a	uaf-1		1		1	1
ZC250.1a	cyn-17		1		1	1
ZC373.1a	cbs-1		1		1	1
ZC395.2	clk-1		1		1	1
ZC395.3a	toc-1		1		1	1
ZC434.2	rps-7		1		1	1
ZK1236.3a	sor-1		1		1	1
ZK1248.10	tbc-2		1		1	1
ZK1248.3a	ehs-1		1		1	1
ZK1320.9			1		1	1
ZK287.1a			1		1	1
ZK328.1a	cyk-3		1		1	1
ZK632.4			1		1	1
ZK652.10	tag-307		1		1	1
ZK686.3			1		1	1
ZK688.5a			1		1	1
ZK945.2	pas-7		1		1	1
M117.2a	par-5	14	75	75	61	0
T04A8.7a		6	56	56	50	0
Y54G11A.5	ctl-2		41	41	41	0
H24K24.5	fmo-5		32	32	32	0
F55A3.3	spt-16	11	42	42	31	0
F43E2.7a	mtch-1	1	28	28	27	0
M110.4a	ifg-1		27	27	27	0
T03F6.5	lis-1	2	28	28	26	0
F48E8.5	paa-1	3	25	25	22	0
K07C5.1	arx-2	5	22	22	17	0
R11A8.6	iars-1	17	32	32	15	0
R13F6.10	cra-1	4	18	18	14	0
E04A4.7	cyc-2.1	3	16	16	13	0
K09A9.5	gas-1		11	11	11	0
Y71F9AL.16	arx-1		11	11	11	0
W08G11.4	pptr-1	4	14	14	10	0
F27D9.5	pcca-1		9	9	9	0
Y55F3BR.1			9	9	9	0
B0348.6a	ife-3	1	9	9	8	0
T20B3.1			8	8	8	0
Y110A7A.18	ppw-2		8	8	8	0
Y66H1B.2a	fln-1		8	8	8	0
F46F2.2a	kin-20		7	7	7	0
C44E4.5			6	6	6	0
F29F11.6a	gsp-1		6	6	6	0
K07E8.7			6	6	6	0
T07A9.3	kgb-1		6	6	6	0
Y41D4B.19a	npp-8	7	13	13	6	0
F25G6.9		5	10	10	5	0
F32B4.4a			5	5	5	0
F43G9.1	idha-1		5	5	5	0
K08H10.1b	lea-1		5	5	5	0
B0361.10	ykt-6		4	4	4	0
C01G6.1a	aqp-2		4	4	4	0
C04C3.3	pdhb-1		4	4	4	0
C56G2.6a	let-767	4	8	8	4	0
D1037.4	rab-8	1	5	5	4	0
F10B5.2			4	4	4	0
F10B5.8	ints-11		4	4	4	0
F56F11.4a			4	4	4	0
K02C4.3		1	5	5	4	0
K08H10.4	uda-1		4	4	4	0
T25G3.4	gpdh-3		4	4	4	0
W08E3.3a	ola-1		4	4	4	0
Y37A1B.1a	lst-3		4	4	4	0
Y38A8.3	ulp-2		4	4	4	0
Y49E10.1	rpt-6		4	4	4	0
Y65B4BL.2	deps-1	2	6	6	4	0
C01F6.8a	icln-1		3	3	3	0
C06G1.5a			3	3	3	0
C09H10.7	apc-17	1	4	4	3	0
C18E3.7a	ppw-1		3	3	3	0
C43E11.11	cogc-5		3	3	3	0
F41E6.4a	smk-1		3	3	3	0
F47B10.2	haly-1		3	3	3	0
F54D12.6a	rog-1		3	3	3	0
H26D21.2	msh-2		3	3	3	0
K09B11.9a	uso-1		3	3	3	0
R05F9.12	aagr-2		3	3	3	0
T01C3.7	fib-1		3	3	3	0
T19B10.2			3	3	3	0
T24A11.1a	mtm-3	1	4	4	3	0
Y119D3B.12a		23	26	26	3	0
Y39A1A.15a	cnt-2		3	3	3	0
Y48G1C.8			3	3	3	0
Y54E10A.9a	vbh-1		3	3	3	0
Y71G12B.12a	atg-5		3	3	3	0
Y87G2A.3a	atg-4.1		3	3	3	0
ZC518.2	sec-24.2	3	6	6	3	0
ZK1098.5	trpp-3		3	3	3	0
B0432.8			2	2	2	0
B0513.1a	lin-66	4	6	6	2	0
C01B10.11			2	2	2	0
C28C12.7a	spp-10		2	2	2	0
C30H6.7a	dlat-2		2	2	2	0
C35D10.16	arx-6		2	2	2	0
D2063.3a	glrx-3		2	2	2	0
F01G4.3	skih-2		2	2	2	0
F07F6.8			2	2	2	0
F08B4.5	pole-2		2	2	2	0
F11G11.2	gst-7		2	2	2	0
F11G11.7	dnj-9		2	2	2	0
F13H8.2			2	2	2	0
F17A9.2	cwf-19L1		2	2	2	0
F45E6.3	tbc-13		2	2	2	0
F46F6.2a	pkn-1	1	3	3	2	0
K08E7.1	eak-7		2	2	2	0
R10E11.1a	cbp-1		2	2	2	0
R10E4.4	mcm-5	1	3	3	2	0
R160.1a	dpy-23		2	2	2	0
T03G11.6	metl-9		2	2	2	0
T05H4.13a	alh-4		2	2	2	0
T10B11.6			2	2	2	0
T22H6.2a	alh-13		2	2	2	0
W02B9.1a	hmr-1		2	2	2	0
W03A5.7	dnj-24		2	2	2	0
Y110A7A.6a	pfkb-1.1		2	2	2	0
Y53G8AL.2	nduf-9		2	2	2	0
Y67D8A.2a			2	2	2	0
Y71H2AM.19a	laf-1		2	2	2	0
Y95B8A.8			2	2	2	0
B0207.4	air-2		1	1	1	0
C08B6.3a			1	1	1	0
C26B9.3			1	1	1	0
CC4.3	smu-1		1	1	1	0
F33H1.4			1	1	1	0
F42G9.1a	ppm-1.G		1	1	1	0
F54D8.3a	alh-1		1	1	1	0
F55A11.1			1	1	1	0
K10D2.1a	hira-1		1	1	1	0
R08C7.10a	wapl-1		1	1	1	0
R08D7.2	rpap-2	1	2	2	1	0
T07C4.3a			1	1	1	0
T11F8.3	rme-2		1	1	1	0
T25E12.5	gyg-2		1	1	1	0
W02D3.1	cytb-5.2		1	1	1	0
Y39H10A.3a	mtm-9		1	1	1	0
Y48A6C.3	sup-35		1	1	1	0
Y49E10.14a	pie-1		1	1	1	0
Y53F4B.18			1	1	1	0
Y54E10BL.6	mek-2		1	1	1	0
Y54E2A.4a			1	1	1	0
Y79H2A.3a			1	1	1	0
ZK829.7		1	2	2	1	0
