# Supplementary material for: PIE-1 SUMOylation promotes germline fates and piRNA-dependent silencing in C. elegans
Source: eLife. 2021 May 18;10:e63300. doi: 10.7554/eLife.63300 (PMC8131105; doi:10.7554/eLife.63300)
Supplement: Supplementary file 3. [file elife-63300-supp3.xlsx]

## Sheet: Sheet1
Supplementary File 3. List of C. elegans SUMO targets also identified by Kaminsky et al. (2009) or by Drabikowski et al. (2018).
Overlapping proteins
This study and Kaminsky et al.	This study and Drabikowski et al.
UBC-9	MCM-2
RAN-1	EIF-3.F
MATH-33	ACT-4
IDH-1	UBC-9
TRAP-1	RPN-6.1
T25B9.9	ADSL-1
VIT-3	KAT-1
UNC-54	HSP-4
PRMT-1	MRPS-30
PAS-7	ASP-4
MDH-1	CHIL-10
IFB-2	F41C3.5
PDI-2	EARS-1
W08E12.7	HTZ-1
MEL-32	RUVB-1
TCT-1	IPGM-1
LMN-1	TRAP-1
OATR-1	ACER-1
RPL-10	MDT-15
ATP-1	DLC-1
Y37D8A.2	VIT-3
DPY-27	SUR-5
RPL-6	ARP-1
Y37A1B.5	HDA-1
NPA-1	DLI-1
HSP-6	CCT-2
GOT-2.2	PAS-7
VHA-13	RPN-7
VIT-6	F42G8.10
FARS-2	TLN-1
PBRM-1	C36A4.4
GPD-1	VHA-19
FBP-1	Y105E8A.2
VDAC-1	C41G7.9
Y48B6A.1	Y44E3A.6
ATP-2	FNTB-1
VIT-4	MEL-32
RDE-12	CCT-8
R07H5.8	PDPR-1
MRG-1	ACT-2
CTS-1	PBS-3
ABCF-3	PQN-52
RPL-15	MCM-7
RPS-4	C50F4.16
GEI-17	Y48G8AL.5
INF-1	NPL-4.1
WAH-1	ATN-1
ASG-2	YOP-1
FTT-2	USP-5
PCK-2	NUO-1
F28H6.4	GOT-2.2
UCR-1	Y92H12BR.3
RPL-2	RPS-9
RPS-6	T10B10.3
C32F10.8	TBA-1
MYO-3	MTR-4
ALH-8	BCKD-1B
CDC-48.1	DDX-15
TALD-1	PAS-2
VIT-1	Y57A10A.26
SMO-1	CLU-1
ERM-1	SPC-1
K04F10.7	T25G3.3
DSC-4	RAB-5
VIT-2	CCT-6
RPL-18	MEN-1
PAB-1	HSP-75
TBA-2	GDI-1
RACK-1	T05H10.1
IMPH-1	F33H2.6
HSP-90	ARL-8
ASB-2	DEB-1
RAN-2	CIF-1
ACO-2	VIT-4
RPS-1	C34B2.10
NID-1	UNC-61
EEF-2	HRP-2
GLS-1	ZK353.9
TBB-2	ASB-1
DPT-1	MRG-1
UBA-1	CTS-1
EEF-1A.1	ABCF-3
POD-1	GEI-17
CEH-38	C18E9.4
PDI-3	RPA-1
PCCB-1	SQV-4
C06G4.1	M05D6.6
LEC-1	EIF-3.L
PRDX-2	RAB-6.2
TSN-1	FTT-2
IFF-2	IFD-1
LPD-9	NASP-2
PES-9	UFD-3
RPS-3	F32D1.5
RPL-7	DPY-18
PYGL-1	RPN-12
RIL-1	XPO-2
AHCY-1	NRA-2
NUO-4	K12H4.3
HSP-3	UCR-1
SUCA-1	T28H10.3
VIT-5	NKAT-3
RPL-4	C32F10.8
HSP-1	F32A11.1
VHA-12	ALH-8
TKT-1	NHR-49
ANT-1.1	INOS-1
C42D4.1	RME-8
F44E7.4	TALD-1
OSTB-1	VIT-1
PAS-4	HCF-1
EEF-1G	DCN-1
NOL-58	CSN-4
HEL-1	UNC-15
ICL-1	RME-1
PCN-1	GSK-3
H05C05.1	ATG-18
ENPL-1	RAE-1
B0491.5	LYS-1
R05F9.6	F21D5.1
GTA-1	IDH-2
SELT-1.1	IFET-1
APP-1	VAB-10
	TRAP-2
	ARL-1
	GLS-1
	SWAN-2
	W04D2.4
	RPT-5
	BRE-1
	HGRS-1
	W04G3.5
	TBB-2
	RPS-25
	DPT-1
	UBA-1
	RPL-30
	PRG-1
	CLEC-266
	F09E5.3
	GMPS-1
	POD-1
	TEG-4
	ELKS-1
	SRP-7
	TFG-1
	CYN-15
	LEC-1
	CNX-1
	UNC-60
	K02D10.1
	SAMS-4
	IMB-1
	UNC-70
	CYC-1
	RPS-29
	GLN-6
	NDK-1
	LPD-9
	ACLY-2
	CUT-6
	C05D11.1
	GFAT-2
	MEK-1
	FARS-1
	DDB-1
	C01F1.3
	LET-92
	DPF-3
	FNTA-1
	PGAM-5
	KARS-1
	RPS-5
	TBB-1
	NOS-3
	ARX-3
	CPR-6
	C15C7.4
	CAS-1
	KIN-3
	Y67H2A.10
	UBA-2
	F44E7.4
	PRMT-5
	PHY-2
	HPO-19
	F54D5.12
	SMG-2
	TBH-1
	PHO-14
	NUO-6
	WDFY-2
	ERFA-3
	K12H4.4
	R04F11.2
	ALH-9
	PCN-1
	HRP-1
	ACLY-1
	Y60A3A.9
	AIPL-1
	ENPL-1
	DPF-5
	CLEC-87
	CCT-4
	RPA-2
	ZC434.8
	T03F6.3
	ASG-1
	C07D8.6
	PBS-7
	CDK-1
	CCT-7
	GTA-1
	APP-1
	WAGO-1
