# Supplementary material for: PIE-1 SUMOylation promotes germline fates and piRNA-dependent silencing in C. elegans
Source: eLife. 2021 May 18;10:e63300. doi: 10.7554/eLife.63300 (PMC8131105; doi:10.7554/eLife.63300)
Supplement: Supplementary file 4. [file elife-63300-supp4.xlsx]

## Sheet: Sheet1
Supplementary File 4. List of PIE-1-dependent SUMO targets.
locus	gene	spectra count			difference of spectra count		fold change (within x1.5)
		Control(L4440)	smo-1 RNAi	pie-1 RNAi	L4440 - smo-1 RNAi	L444 - pie-1 RNAi	(L4440-smo-1RNAi)/(L4440-pie-1RNAi)
K07A1.12	lin-53	53	32	39	21	14	1.5
C17H12.1	dyci-1	24	9	14	15	10	1.5
F46E10.10a	mdh-1	37	25	29	12	8	1.5
Y37E11AL.7a	map-1	16	4	8	12	8	1.5
Y57G11C.16	rps-18	22	13	16	9	6	1.5
Y71G12B.24	mppa-1	10	4	6	6	4	1.5
R07E5.13	mpc-1	6		2	6	4	1.5
ZK858.3	clec-91	6		2	6	4	1.5
Y66H1A.2a	dpm-1	10	7	8	3	2	1.5
Y61A9LA.10		7	4	5	3	2	1.5
ZK616.6	perm-3	6	3	4	3	2	1.5
C06E7.1a	sams-3	5	2	3	3	2	1.5
F35G12.11	erh-2	5	2	3	3	2	1.5
T07D3.9a		5	2	3	3	2	1.5
C04G2.6	dis-3	3		1	3	2	1.5
C38C3.5a	unc-60	3		1	3	2	1.5
F09G2.4	cpsf-2	3		1	3	2	1.5
F39B2.6	rps-26	3		1	3	2	1.5
Y51H1A.3a		3		1	3	2	1.5
Y48E1B.7	lin-38	110	82	91	28	19	1.47368
C03G5.1	sdha-1	34	18	23	16	11	1.45455
Y45F10D.12	rpl-18	70	40	49	30	21	1.42857
F40F9.6a	aagr-3	46	29	34	17	12	1.41667
F10D11.1	sod-2	36	19	24	17	12	1.41667
Y48G8AL.8a	rpl-17	35	11	18	24	17	1.41176
W01A8.4	nuo-6	15	8	10	7	5	1.4
Y49E10.19	ani-1	11	4	6	7	5	1.4
R53.4		24	6	11	18	13	1.38462
Y71H2AM.23	tufm-1	41	19	25	22	16	1.375
R05F9.6		24	13	16	11	8	1.375
F58G11.2a	rde-12	232	216	220	16	12	1.33333
F57B10.3a	ipgm-1	54	42	45	12	9	1.33333
C15H11.3a	nxf-1	49	37	40	12	9	1.33333
T27C4.4a	lin-40	35	23	26	12	9	1.33333
F32B6.2	mccc-1	15	7	9	8	6	1.33333
F28B3.7a	him-1	13	5	7	8	6	1.33333
T25B9.9		40	36	37	4	3	1.33333
Y108G3AL.2		11	7	8	4	3	1.33333
R12B2.4	him-10	6	2	3	4	3	1.33333
C44C8.6	mak-2	5	1	2	4	3	1.33333
E04A4.5	timm-17B.1	4		1	4	3	1.33333
T13B5.3	pho-14	23	14	16	9	7	1.28571
B0041.2a	ain-2	22	13	15	9	7	1.28571
F37D6.2a	row-1	95	63	70	32	25	1.28
F10E7.7	rpl-33	39	11	17	28	22	1.27273
F56F3.1	ifet-1	130	77	88	53	42	1.2619
F49D11.1	prp-17	58	23	30	35	28	1.25
W09H1.6a	lec-1	55	35	39	20	16	1.25
R10D12.14a	sao-1	38	23	26	15	12	1.25
F01F1.9	dnpp-1	12	7	8	5	4	1.25
F33H2.6		7	2	3	5	4	1.25
C05D11.11a	mel-32	51	27	31	24	20	1.2
C01F6.6a	nrfl-1	108	96	98	12	10	1.2
K11H12.2	rpl-15	48	36	38	12	10	1.2
C53B7.4	asg-2	12	6	7	6	5	1.2
C15F1.7a	sod-1	24	11	13	13	11	1.18182
Y37E3.17a		76	43	48	33	28	1.17857
T05G5.10a	iff-1	41	14	18	27	23	1.17391
C37C3.8a	tag-253	38	24	26	14	12	1.16667
F53C11.8	swan-1	7		1	7	6	1.16667
R04F11.2		7		1	7	6	1.16667
T24C4.7	ztf-18	7		1	7	6	1.16667
R13H8.1a	daf-16	7		1	7	6	1.16667
F37C12.9	rps-14	16		2	16	14	1.14286
C53A5.3	hda-1	74	66	67	8	7	1.14286
C39F7.4	rab-1	23	15	16	8	7	1.14286
M7.1	let-70	10	2	3	8	7	1.14286
F53F10.3	mpc-2	10	1	2	9	8	1.125
ZK994.3	pxn-1	19	6	7	13	12	1.08333
Y5F2A.4		33	17	18	16	15	1.06667
K04F10.7		40	24	25	16	15	1.06667
T05C3.5	dnj-19	38	18	19	20	19	1.05263
Y39E4A.3a	bckd-1A	37	20	20	17	17	1
W07G4.4	lap-2	38	22	22	16	16	1
F54F2.1	pat-2	16	1	1	15	15	1
BE0003N10.3		22	8	8	14	14	1
F36A2.1a	cids-2	58	45	45	13	13	1
F11A10.8	cpsf-4	25	13	13	12	12	1
F28C6.3	cpf-1	13	1	1	12	12	1
F54E7.2	rps-12	12			12	12	1
Y40B1A.4	sptf-3	15	4	4	11	11	1
R07E5.2	prdx-3	13	2	2	11	11	1
F14D12.2	unc-97	66	56	56	10	10	1
T05E11.1	rps-5	21	11	11	10	10	1
C06C3.1a	mel-11	15	5	5	10	10	1
C44B12.1	perm-2	9			9	9	1
W02D9.1a	pri-2	12	4	4	8	8	1
Y56A3A.21	trap-4	32	26	26	6	6	1
F46E10.9	dpy-11	16	10	10	6	6	1
B0025.2	csn-2	8	2	2	6	6	1
F25D7.3a	blmp-1	6			6	6	1
K12H4.4	spcs-3	9	4	4	5	5	1
T04F8.1	sfxn-1.5	7	2	2	5	5	1
Y71G12B.20a	mab-20	6	1	1	5	5	1
B0334.15	emc-5	5			5	5	1
C34G6.6a	noah-1	5			5	5	1
F45E12.1a	cnep-1	6	2	2	4	4	1
F02E9.10a		5	1	1	4	4	1
F10G8.3	rae-1	4			4	4	1
F54C9.10	arl-1	4			4	4	1
K10C3.6a	nhr-49	4			4	4	1
M04F3.4a		4			4	4	1
R06C7.3	dhp-1	4			4	4	1
T26A5.9	dlc-1	4			4	4	1
W06H3.2a	pus-1	4			4	4	1
Y66D12A.15	xpb-1	4			4	4	1
ZK858.7		4			4	4	1
C18E9.4		7	4	4	3	3	1
R09B3.5	mag-1	5	2	2	3	3	1
BE0003N10.1		3			3	3	1
C06A6.5	erp-44.2	3			3	3	1
F10D11.2		3			3	3	1
F53H10.2a	saeg-1	3			3	3	1
F54D5.12		3			3	3	1
K02D10.1a		3			3	3	1
K04D7.3a	gta-1	3			3	3	1
M01E10.2a	dpy-1	3			3	3	1
R07H5.2a	cpt-2	3			3	3	1
R11A8.4a	sir-2.1	3			3	3	1
R11D1.9	mrpl-49	3			3	3	1
T01C3.6	rps-16	3			3	3	1
T23G7.1	dpl-1	3			3	3	1
Y59A8B.6	prp-6	3			3	3	1
Y73B3A.18a		3			3	3	1
Y60A3A.9	tmed-4	11	9	9	2	2	1
R10E4.2b	sup-26	8	6	6	2	2	1
Y37E3.7	rla-1	6	4	4	2	2	1
F57C7.1a	bet-2	5	3	3	2	2	1
F52F12.3	mom-4	3	1	1	2	2	1
F59E10.1	orc-2	3	1	1	2	2	1
B0035.14a	dnj-1	2			2	2	1
B0035.16	mttu-1	2			2	2	1
B0412.4	rps-29	2			2	2	1
C09B8.7a	pak-1	2			2	2	1
C14B9.6a	gei-8	2			2	2	1
C17G10.8	dhs-6	2			2	2	1
C26E6.2	flh-2	2			2	2	1
C26F1.7a	hint-3	2			2	2	1
C27A2.2a	rpl-22	2			2	2	1
C34B2.10	spcs-1	2			2	2	1
C35D10.6		2			2	2	1
C37A2.7		2			2	2	1
C41H7.3	lido-12	2			2	2	1
C53B4.7a	bre-1	2			2	2	1
D1081.7a		2			2	2	1
F01G10.7	lipl-7	2			2	2	1
F20G2.3a		2			2	2	1
F23H12.4a	sqt-3	2			2	2	1
F25F2.2a	cdh-4	2			2	2	1
F32D8.5a		2			2	2	1
F35G2.4	phy-2	2			2	2	1
F41G4.2a	cas-1	2			2	2	1
F44F1.7	vet-6	2			2	2	1
F53A2.6a	ife-1	2			2	2	1
F54D8.2	tag-174	2			2	2	1
F54F2.9		2			2	2	1
H24K24.3a		2			2	2	1
JC8.6a	lin-54	2			2	2	1
K04G2.5	ath-1	2			2	2	1
K07C11.7a		2			2	2	1
K12H6.1	nhr-119	2			2	2	1
M01F1.2	rpl-16	2			2	2	1
M106.5	cap-2	2			2	2	1
R74.5a	asd-1	2			2	2	1
T22D1.10	ruvb-2	2			2	2	1
Y105C5B.21a	jac-1	2			2	2	1
Y105E8A.16	rps-20	2			2	2	1
Y105E8A.2		2			2	2	1
Y18D10A.20	pfn-1	2			2	2	1
Y38A8.2	pbs-3	2			2	2	1
Y38F2AR.9	sec-61.B	4	2	2	2	2	1
Y44E3A.6a	edc-4	2			2	2	1
Y48G1A.3	daf-25	2			2	2	1
Y53F4B.9		2			2	2	1
Y57G11C.13	arl-8	2			2	2	1
ZC404.8	spn-4	2			2	2	1
C35C5.3a	selt-1.1	30	29	29	1	1	1
Y113G7A.9a	dcs-1	23	22	22	1	1	1
T02G5.8	kat-1	9	8	8	1	1	1
Y49A3A.2	vha-13	6	5	5	1	1	1
W09C5.2	unc-59	5	4	4	1	1	1
F07D10.1	rpl-11.2	5	4	4	1	1	1
ZK863.3	elpc-3	4	3	3	1	1	1
C50E3.5		2	1	1	1	1	1
F09E5.2	algn-2	2	1	1	1	1	1
F20D1.6	rbg-1	2	1	1	1	1	1
F38A5.1a	odr-8	2	1	1	1	1	1
H27M09.1	sacy-1	2	1	1	1	1	1
W04G3.5a		2	1	1	1	1	1
Y119D3B.11	orc-3	2	1	1	1	1	1
B0303.9	vps-33.1	1			1	1	1
B0495.9		1			1	1	1
C01G10.11a	unc-76	1			1	1	1
C01G5.6	ddi-1	1			1	1	1
C01H6.7a	swsn-9	1			1	1	1
C03D6.4	npp-14	1			1	1	1
C06B8.1	nhr-150	1			1	1	1
C06G3.10	cogc-2	1			1	1	1
C07D10.5		1			1	1	1
C09G12.8a	ced-10	1			1	1	1
C09G5.2a	dph-2	1			1	1	1
C14A4.5	crn-5	1			1	1	1
C32E8.11	ubr-1	1			1	1	1
C50F4.16		1			1	1	1
D2085.3	eif-2Bepsilon	1			1	1	1
F01F1.6	alh-9	1			1	1	1
F09E5.3		1			1	1	1
F15C11.1	sem-4	1			1	1	1
F18C12.2a	rme-8	1			1	1	1
F18E3.7a	ddo-2	1			1	1	1
F20B6.8a	hpk-1	1			1	1	1
F20C5.5		1			1	1	1
F20D6.4a	srp-7	1			1	1	1
F21C3.3	hint-1	1			1	1	1
F32A7.5a	maph-1.1	1			1	1	1
F38H4.6		1			1	1	1
F40G9.3	ubc-20	1			1	1	1
F41E6.13a	atg-18	1			1	1	1
F41E6.6	tag-196	1			1	1	1
F42A10.4a	efk-1	1			1	1	1
F44C4.4a	gon-14	1			1	1	1
F55A4.1	sec-22	1			1	1	1
F55A4.5	stau-1	1			1	1	1
K02F6.7		1			1	1	1
K05C4.1	pbs-5	1			1	1	1
K09H11.15		1			1	1	1
K12H4.5		1			1	1	1
M57.2a		1			1	1	1
M6.1a	ifc-2	1			1	1	1
M70.5		1			1	1	1
R07B1.1	vab-15	1			1	1	1
R17.2	pde-12	1			1	1	1
T04B2.2a	frk-1	1			1	1	1
T10B10.3		1			1	1	1
T14B4.3		1			1	1	1
T15H9.4		1			1	1	1
T20D4.11		1			1	1	1
T21H8.5		1			1	1	1
T25G12.4	rab-6.2	1			1	1	1
W03F9.1		1			1	1	1
W09G10.4a	apd-3	1			1	1	1
Y18D10A.19	fkb-2	1			1	1	1
Y26E6A.1	ekl-5	1			1	1	1
Y38C1BA.2a	snn-1	1			1	1	1
Y39B6A.20	asp-1	1			1	1	1
Y45F3A.3a	acdh-11	1			1	1	1
Y47D3B.10	dpy-18	1			1	1	1
Y48B6A.12	men-1	1			1	1	1
Y48E1B.10	gst-20	1			1	1	1
Y48G8AL.10		1			1	1	1
Y51H1A.5	hda-10	1			1	1	1
Y54E10BR.6	rpb-7	1			1	1	1
Y54E2A.2	smg-9	1			1	1	1
Y54F10AM.2a	feh-1	1			1	1	1
Y59E9AL.7	nbet-1	1			1	1	1
Y66D12A.23	nars-2	1			1	1	1
Y69A2AL.1	grd-16	1			1	1	1
Y71G12B.8	ddx-27	1			1	1	1
Y92C3B.2a	uaf-1	1			1	1	1
ZC250.1a	cyn-17	1			1	1	1
ZC373.1a	cbs-1	1			1	1	1
ZC395.2	clk-1	1			1	1	1
ZK1248.10	tbc-2	1			1	1	1
ZK1320.9		1			1	1	1
ZK287.1a		1			1	1	1
ZK328.1a	cyk-3	1			1	1	1
ZK632.4		1			1	1	1
C44B7.10	acer-1	201	156	155	45	46	0.978261
F09E5.15a	prdx-2	27	10	9	17	18	0.944444
Y41D4A.5	ptpn-22	24	11	10	13	14	0.928571
W04D2.4		93	82	81	11	12	0.916667
C08H9.2a	vgln-1	288	234	229	54	59	0.915254
F52G2.2a	rsd-2	22	13	12	9	10	0.9
Y54H5A.1		14	5	4	9	10	0.9
B0336.2	arf-1.2	25	17	16	8	9	0.888889
E01A2.2a		12	4	3	8	9	0.888889
C05D11.12	let-721	11	4	3	7	8	0.875
E02H1.2	eral-1	10	3	2	7	8	0.875
F56B3.11a		8	1		7	8	0.875
M03D4.4a		31	19	17	12	14	0.857143
F28C6.7a	rpl-26	8	2	1	6	7	0.857143
F13D11.2a	hbl-1	90	64	59	26	31	0.83871
F26B1.3	ima-2	42	37	36	5	6	0.833333
Y71F9AM.6	trap-1	22	17	16	5	6	0.833333
F42G8.10a		14	9	8	5	6	0.833333
F38E11.3	cpin-1	8	3	2	5	6	0.833333
T05F1.6	hsr-9	60	37	32	23	28	0.821429
K02B2.5	rps-25	11	2		9	11	0.818182
C46A5.9	hcf-1	20	8	5	12	15	0.8
R08C7.3	htz-1	18	6	3	12	15	0.8
K08F4.2	gtbp-1	34	30	29	4	5	0.8
C07D8.6		26	22	21	4	5	0.8
C48G7.3a	rin-1 status:Confirmed UniProt:G5ECF0 protein_id:CAQ35026.1	7	3	2	4	5	0.8
T05H10.6a	pdha-1	9	5	4	4	5	0.8
T18D3.1		78	71	69	7	9	0.777778
F26D10.10	gln-5	36	29	27	7	9	0.777778
F13B10.2a	rpl-3	1159	926	857	233	302	0.771523
W09C5.1		35	25	22	10	13	0.769231
T21C9.5a	lpd-9	36	18	12	18	24	0.75
F18A1.2a	lin-26	13	4	1	9	12	0.75
F09B9.2a	unc-115	16	10	8	6	8	0.75
ZK1151.1a	vab-10	10	4	2	6	8	0.75
F52B11.3	noah-2	8	2		6	8	0.75
T20D3.7a	vps-26	11	8	7	3	4	0.75
F53F10.4	unc-108	11	8	7	3	4	0.75
F39B2.10	dnj-12	6	3	2	3	4	0.75
Y57A10A.26		6	3	2	3	4	0.75
B0336.10	rpl-23	5	2	1	3	4	0.75
C02F5.6a	henn-1	5	2	1	3	4	0.75
Y48B6A.1		4	1		3	4	0.75
W08E3.2	casc-3	35	16	9	19	26	0.730769
C42D4.1		42	24	16	18	26	0.692308
D1046.2		19	10	6	9	13	0.692308
C25B8.3a	cpr-6	141	121	112	20	29	0.689655
F52D1.1	aagr-4	109	68	49	41	60	0.683333
Y48G1C.2	csk-1	21	13	9	8	12	0.666667
C50D2.8	luc-7L3	35	29	26	6	9	0.666667
Y55F3AM.15	csn-4	26	20	17	6	9	0.666667
F44G4.2		10	4	1	6	9	0.666667
Y113G7A.3	sec-23	27	23	21	4	6	0.666667
Y18D10A.17	car-1	19	15	13	4	6	0.666667
C25E10.12		8	4	2	4	6	0.666667
C34F6.8	idh-2	6	2		4	6	0.666667
D1069.3a		7	5	4	2	3	0.666667
Y43F8C.7		5	3	2	2	3	0.666667
F08G12.2	cnrp-40.1	3	1		2	3	0.666667
T19B4.1	pamn-1	3	1		2	3	0.666667
C15C7.4		3	1		2	3	0.666667
